# Supplementary material
Source: PubMed Central journal article supplement (PMC9417284)
Supplement: mmc1.pdf [file mmc1.pdf]

# THE LANCET

## Digital Health

### Supplementary appendix

This appendix formed part of the original submission and has been peer reviewed. We post it as supplied by the authors.

Supplement to: Kotanidis CP, Xie C, Alexander D, et al. Constructing custom-made radiotranscriptomic signatures of vascular inflammation from routine CT angiograms: a prospective outcomes validation study in COVID-19. *Lancet Digit Health* 2022; published online Aug 26. [https://doi.org/10.1016/S2589-7500\(22\)00132-7](https://doi.org/10.1016/S2589-7500(22)00132-7).

## **- Online Methods -**

### ***Inclusion & Exclusion criteria***

Patients in Study Arm 1 originated from the AdipoRedOx study (Oxford REC C: 11/SC/0140), which enrolls patients undergoing cardiac surgery [including coronary artery bypass grafting (CABG) and valve replacement/repair] at the John Radcliffe hospital, Oxford University NHS Foundation Trust, UK. Exclusion criteria include inflammatory, neoplastic, renal, or hepatic diseases. All subjects in Study Arm 1 have given written informed consent for sample and data collection, and follow-up imaging. Subjects in Study Arm 2 are part of the prospective arm of the Oxford Risk Factors and cArteriovascular imagiNg (ORFAN) study (Oxford REC C: 15/SC/0545, NCT05169333). These patients gave written informed consent to participate in the study and came back for a follow up CCTA scan. The patients in Study Arms 3 and 4 are part of the registry arm of the Oxford Risk Factors and cArteriovascular imagiNg (ORFAN) study (Oxford REC C: 15/SC/0545, NCT05169333), and the collection of pseudoanonymised data was performed under Section 251 (NHS Act 2006), with specific approval from the Confidentiality Advisory Group (CAG, reference 20/CAG/0157), as defined in the ORFAN Study protocol.

### ***Severity of COVID-19***

The severity of COVID-19 infection in our population was defined according to the WHO Working Group on the Clinical Characterisation and Management of COVID-19 infection scoring system for hospitalised patients, as follows: mild disease: hospitalised patients not requiring oxygen therapy (score 4); moderate disease: patients requiring oxygen by mask or nasal prongs

(score 5); severe disease: patients supported with non-invasive ventilation (score 6); critical: patients supported with intubation and mechanical ventilation (score 7-9)<sup>1</sup>.

### ***Tissue Collection, RNA Isolation and Sequencing Library Preparation***

In Study Arm 1, IMA specimens were collected during surgery and stored in TRI reagent (Sigma, catalogue number T9424) at -80°C until thawed for RNA isolation. Total RNA was isolated by a phenol to chloroform (1:5 ratio) separation protocol followed by a magnetic beads-based RNA purification method on a KingFisher magnetic particle processor (Thermo Fisher Scientific), using the MagMAX mirVana total RNA isolation kit (Thermo Fisher Scientific, Catalogue Number A27828). RNA concentration was assessed spectrophotometrically on NanoDrop ND-1000. For RNA sequencing, the QuantSeq 3' mRNA (Lexogen) library preparation kit was used. All samples were sequenced as part of a large multiplex pool on an Illumina NovaSeq 6000 system producing 150bp paired-end reads. The COMBAT whole blood RNAseq dataset was generated as described previously<sup>2</sup>. Briefly, whole blood was collected into Tempus tubes (Life Technologies) and frozen at -80°C until extraction in batches. Total RNA-seq was performed with libraries prepared by Oxford Genomics Centre with the NEBNext Ultra II Directional RNA Library Prep Kit for Illumina after rRNA and globin depletion. Libraries were sequenced as a single pool of 144 samples (124 patients) on one NovaSeq S4 flow cell (4 lanes) with a target of 50M 100bp read pairs per sample.

### ***Sequencing Data Processing and Analysis***

RNAseq read pairs were split and only read 1 was used for alignment and quantification, appropriate for the library preparation protocol used. After initial poor mapping results with full-

length 150bp reads, reads reduced to 75bp and trimmed for adapter and low-complexity sequence using fqtrim v0.9.5<sup>3</sup> were aligned to Homo sapiens reference genome, GRCh37 using Hisat2 version-2.0.4<sup>4</sup>. Gene annotation files were downloaded in GTF format from Ensembl, release 76<sup>5</sup>. Reads mapping to annotated exon features were quantified with featureCounts<sup>6</sup>, part of subread-v1.5.0<sup>7</sup>, using default parameters and keeping all aligned reads including potential duplicates (due to the 3' protocol). Quality metrics for aligned reads were estimated using CollectRnaSeqMetrics, implemented in Picard tools v1.92<sup>8</sup>. The raw count tables produced by featureCounts were imported in R Statistical Software<sup>9</sup> for further processing and analysis using in-built functionality and relevant packages as detailed below. In COMBAT, adaptor sequences were removed with TrimGalore, reads aligned to the reference genome (GRCh18) using STAR and read counts generated with featureCounts and annotations from Ensembl (v100). One poor quality sample was removed, and features filtered based on a threshold of >10 reads in >10 samples. The data were normalised using the trimmed mean of M-values method from edgeR and log2-transformation. Samples (n=30) from the 23 patients with a CT scan and therefore C19-RS calculated were extracted from this complete dataset.

### ***Clustering and Differential Expression Analysis***

The set of inflammatory genes was extracted from the count table and filtered to exclude those with low expression levels: counts per million (CPM) values were generated using the edgeR package<sup>10</sup> and 51 genes with CPM > 1 in at least 10 out of 55 patients were retained. Unsupervised hierarchical clustering was performed on this set of genes with the Minkowski distance metric (p=10) and ward.D clustering method (heatmap.2 function in the gplots package<sup>11</sup>) and visualised as a heatmap with dendrogram. The 2 clusters of samples identified based on the inflammatory

expression profile were then assessed for differential expression (edgeR package<sup>10</sup>) on the full set of expressed genes in the RNA-Seq dataset. This generated a list of 132 genes identified as differentially upregulated ( $\log_{2}FC > 1$  and  $p < 0.05$ ) between the 2 clusters of patients. In order to validate our clusters for activation of inflammation within the vasculature we conducted pathway enrichment analysis in ConsensusPathDB-human with the up-regulated differentially expressed genes (DEGs); the input for pathway analysis was the set of 132 genes with  $\log_{2}FC > 1$  and  $p < 0.05$ .

In the COMBAT dataset, 77 of the inflammatory genes had been retained post-filtering on the full dataset. The scaled expression of these genes across the range of C19-RS were visualised as a heatmap using the pheatmap R package, and unsupervised clustering was performed as above. Differential expression analysis was performed on protein-coding genes using one sample per patient (closest timepoint to CT scan) and the limma package, comparing high (above median) and low (below median) C19-RS scores and adjusting for age and sex. Multiple testing correction was performed using the Benjamini-Hochberg method.

Weighted Gene Co-expression Network Analysis (WGCNA) was applied through the “cornet” pipeline to identify modules of correlated genes in the complete COMBAT dataset (143 samples from 123 patients) (Langfelder and Horvath, 2008, <https://github.com/sansomlab/cornet.git>). In brief, this uses a stepwise approach of correlation network construction and module detection. Using the soft thresholding power of 4, a signed-hybrid network was built, with the biweight midcorrelation as the adjacency function. The adjacency matrix was transformed into a topological overlap matrix to calculate the dissimilarity, and a dissimilarity threshold of 0.3 was used to merge

modules with very similar expression profiles. Module eigengene values (module first principal component) were used to summarise modules and perform module-C19-RS correlation analysis (Pearson correlation). Pathway enrichment analysis was performed using the hypergeometric test with the default settings of the “cornet” pipeline (<https://github.com/sansomlab/cornet.git>).

### **Viral Genome Sequencing**

Samples were sequenced using a multiplex PCR based approach with the ARTIC LoCost protocol<sup>12</sup> and v3 primers using R9.4.1 flow cells (Oxford Nanopore Technologies, Oxford, UK). Consensus sequences were generated using ARTIC field bioinformatics v1.2.1.<sup>13</sup> All sequences underwent quality control, requiring >90% consensus genome coverage at  $\geq 20$  depth. Lineages were assigned with Pangolin<sup>14</sup>.

### ***Coronary and Pulmonary Computed Tomography Angiography Imaging and Acquisition Protocols***

In Study Arm 1 participants underwent coronary CTA (CCTA) prospectively after patient consent using a 64-slice scanner (LightSpeed Ultra or Revolution GSI, General Electric) as previously described<sup>8</sup>. Heart rate was optimised using intravenous injection of beta-blockers and sublingual glyceryl-trinitrate (800ug) was also administered to achieve maximum coronary vasodilatation. CCTA was performed following intravenous injection of 95ml of iodine-based contrast medium (Niopam 370, BRACCO) at a flow rate of 6mL/sec (tube energy of 120 or 100 kVp, axial slice thickness of 0.625 mm, rotation time of 0.35 sec, detector coverage of 40 mm). Prospective image acquisition was used by ECG-gating at 75% of cardiac cycle (with 100 msec padding for optimal imaging of the right coronary artery if required). In Study Arm 2, we identified patients with

existing CCTA imaging, who were recruited prospectively into the ORFAN study before the pandemic and were participating into the prospective follow up part of the study (NCT05169333). Within that cohort, we then identified patients who had confirmed COVID-19 infection in the past 6 months, and we matched them 1:1 for age, sex, and BMI to control cases from the same cohort who had never been diagnosed with COVID-19 until the time of the screening. These patients were then invited to return for their follow up research CCTA scan, as part of the ORFAN study protocol, which was done prospectively, maintaining identical scanning settings as for their baseline scan. CCTA scans were performed on a 320-slice scanner (Aquilion One, Canon Medical Systems, Tochigi, Japan) In patients with heart rate > 65 beats/minute, 5 mg of intravenous metoprolol (with incremental 5 mg doses up to a maximum dose of 40 mg) Patients also received 0.8 mg of nitroglycerin sublingually immediately before CCTA and iodinated contrast (Iomeron 350, Bracco UK Ltd) was administered at flow rate of 5-6 ml/s. In Study Arms 3 and 4, we identified the consecutive patients who were hospitalised with COVID-19 and had a clinically-indicated CTA of their pulmonary arteries at the Oxford University Hospitals NHS Trust, University Hospitals of Leicester NHS Trust and Royal United Hospitals Bath NHS Trust between March 2020 - January 2021. These were existing scans that were analysed blindly by two operators within the quality management System of the Oxford Cardiovascular CT (OXACCT) core lab. In Study Arm 3, participants underwent pulmonary CTA (CTPA) on the GE Revolution HD CT scanner. During the initial phase of the pandemic, suspected cases of COVID-19 pneumonia had standard CTPA or dual energy CTPA (DECTPA)<sup>15</sup>. The single energy CTPA were perform using 80-120kV and contrast 70-100mL at 4 mL/s dependent on body size. DECTPA were performed using rapid kV switching to optimise contrast and thrombus visualisation. These scans were all non-ECG gated. In Study Arm 4, scans from University Hospitals of Leicester were performed on

a Siemens Somatom Definition Flash CT scanner, using a FLASH protocol with the following scan parameters: dose modulation on, quality reference kVp 100, ref mAs 100, pitch: 2.1, rotation time 0.28s, detector configuration 128x0.6mm, suspended respiration scan from lung apices to lung bases, using a pre monitoring slice at the level of the pulmonary artery for optimal contrast enhancement of the pulmonary arteries, contrast agent: omnipaque 350, 50mls at 4ml/sec plus 50mls saline flush. Scans from the Royal United Hospitals Bath were performed on either Siemens Somatom Definition Edge scanner with the following scan parameters: dose modulation on, quality reference kVp 120, ref mAs 145, pitch 1.2, rotation time 0.5s, detector configuration 128x0.6mm, suspended respiration scan from lung apices to lung bases, using a bolus-tracking method with threshold of 100 HU in an ROI in a slice at the level of the main pulmonary artery and a 4 second delay after triggering, contrast agent: omnipaque 350, 60mls at 5ml/s plus 50mls 0.9% saline flush at 5ml/sec or Siemens Somatom Drive scanner with the following scan parameters: dose modulation on, dual source dual energy 80 kVp / ref mAs 141 and Sn-filter 140 kVp / ref mAs 60, pitch 1.2, rotation time 0.5s, detector configuration 128x0.6mm, suspended respiration scan from lung apices to lung bases, using a bolus-tracking method with threshold of 100 HU in an ROI in a slice at the level of the main pulmonary artery and a 9 second delay after triggering, contrast agent: omnipaque 350, 75mls at 5ml/s plus 25mls 50:50 mix omnipaque 350 / 0.9% saline flush at 5ml/sec.

### ***Adipose Tissue Segmentation and Radiomic Characterization***

Prior to segmentation, all scans were screened for image quality, and ones deemed as poor quality were excluded from further analysis (**appendix p 18**). Image processing and extraction of radiomic features was performed using the CaRi-Research™ toolbox 2.1.1. (Caristo Diagnostics, Oxford



UK).<sup>16</sup> Perivascular adipose tissue segmentation was performed manually around the right IMA from the level of the aortic arch to 120mm caudally. Perivascular space was defined as the space within a radial distance from the outer vessel wall equal to the diameter of the respective vessel, as previously described<sup>17</sup>. A segmentation tool was used to track a cylindrical segmentation area around the internal mammary artery with a diameter as described above. Following this, manual corrections were made, so as to exclude any lung tissue or any other type of tissue posterior to the intrathoracic fascia, which would not be in direct contact with the internal mammary artery. Following this step, the segmentation was computationally thresholded to an attenuation window of -190 to -30 HU in order to isolate perivascular adipose tissue only. Similarly, perivascular adipose tissue segmentation around the descending thoracic aorta was performed manually from the level of the pulmonary artery bifurcation to 67.5mm caudally, as previously described<sup>18</sup>. Perivascular space was defined as the space within a cylindrical layer that is expanded beyond the vessel borders by a distance equal to 10mm. In order to avoid lung tissue and any COVID-19 related lesions, peri-aortic adipose tissue directly adjacent to the left lateral side of the descending thoracic aorta was removed. Again, the segmentation was computationally thresholded to an attenuation window of -190 to -30 HU in order to isolate perivascular adipose tissue only. The segmentations were performed by two experienced researchers, according to a Standard Operating Procedure (SOP), developed within the Oxford Academic Cardiovascular CT Core lab. This SOP provides clear instructions on how the segmentations are performed, and it includes specific process for training of the operators, and criteria to sign them off as competent to perform this analysis. This SOP is part of the Quality Management System of the OXACCT core lab (version 0.1, May 2020), which is a qualified imaging core-lab supporting academic as well as industrial clinical trials. For this study, CPK and CX were the two clinically qualified operators who

performed the analyses of the scans, blinded to group allocation. For C19-RS measurements inter-observer agreement amongst two independent operators was excellent ICC: 0.914. To address this further, in post-hoc analyses we added the rater as a covariate in our multivariable models, and that had no impact on the significance or effect size of C19-RS on the prediction of in-hospital outcomes. Specifically, the HR for C19-RS in predicting in-hospital mortality was 3.20 [95%CI: 1.42-7.19],  $p=0.005$  in Arm 3 and 2.85 [95%CI 1.20-6.75],  $p=0.01$  in Arm 4, when the rater was included into the model together with age, sex, cardiovascular risk factors (hypertension, hyperlipidaemia, diabetes, BMI, presence of coronary artery disease), C-reactive protein plasma levels, white blood cell count, plasma troponin, history of chronic obstructive pulmonary disease and CT tube voltage. Given the heterogeneity of tube voltage and effective energies used in the various imaging protocols, we rescaled all images using 100kVp as reference. Conversion factors (**appendix p 39**) for tube voltage 120kVp and effective energies 55, 58, and 70 keVs were calculated from data previously validated<sup>19</sup>. Radiomic features were extracted using CaRI-Research™ 2.1.1. toolbox (Caristo Diagnostics, Oxford UK) and pyradiomics<sup>16</sup>.

A total of 1,655 radiomic features were extracted from each segmented PVAT volume. Briefly, the radiomic features obtained were based on shape-based analysis, first order statistics, grey level co-occurrence matrix (glcm), grey level run length matrix (glrlm), grey level size zone matrix (glszm), grey level dependence matrix (gldm), neighbouring grey tone difference matrix (ngtdm). All these features were calculated on the original images and after applying transformations on the images. The transformations included Laplacian of Gaussian (log) with various sigma (1, 2, 3, 4, 5 mm), wavelet-LLH, wavelet-LHL, wavelet-LHH, wavelet-HLL, wavelet-HLH, wavelet-HHL, square, square root, logarithm and exponential. The bin width was kept at 25.

### ***Radiomic feature filtering and XGBoost modelling***

Firstly, we performed a stability assessment of all 3,310 different radiomic features. For this purpose we used 24 Lung CT scans (12 paired scans, performed 15 minutes apart) from the RIDER dataset<sup>20</sup> to assess the scan-rescan ICC of each radiomic feature. Only radiomic features with  $ICC \geq 0.90$  were included in further analyses (n=2,177, **appendix p 27**). Although the RIDER dataset was not designed with inflammation in mind, it still provides a valid technical dataset that allows reliable testing of the reproducibility of radiomic features in the PVAT around human IMAs. We next filtered out redundant radiomic features with Spearman's rho coefficient lower than an absolute value of 0.9, using the "findCorrelation" function of the "caret" package in R (n=497). For further filtering of radiomic features we removed features significantly correlated with BMI and total intrathoracic adipose tissue, using a threshold of 0.05 in the Spearman's rho correlation p value (n=333). Next, we isolated a randomly split 20% exploratory subset from the Study Arm 3 population, applied a univariate ROC analysis for outcome prediction in that subset (outcome: COVID-19 positive status) as well as in Study Arm 1 (outcome: high vascular inflammation), and filtered in only those radiomic features that predicted the outcome in both datasets in the same direction (n=144). Finally, recursive feature elimination with a random forest algorithm and repeated five-fold cross-validation showed a plateau in the accuracy of the trained model with a selection of 33 final features (**appendix p 28**).

Radiomic features that were retained after filtering, were scaled and fit in an extreme gradient boosting algorithm. We considered a series of machine learning methodologies to use in our datasets, including other decision trees, and random forest algorithms (**appendix p 40**). Extreme

gradient boosting with method “gbtree” was the method with the best performance. We therefore decided to choose extreme gradient boosting, also because this is the de facto standard algorithm for getting accurate results from predictive modelling with machine learning. It’s the fastest gradient-boosting library with very high accuracy. It is understood to perform well in many applications with a fair amount of data and can detect and learn from non-linear data patterns<sup>21</sup>. The final product of the XGBoost algorithm (namely the raw logit values) was defined as C19-RS. To avoid overfitting issue, we used 5-fold cross validation and tuned the hyperparameters by optimising step size shrinkage, L2 regularization parameter and learning rate. We used early stopping technique that works by monitoring the performance of the model that is being trained on a separate test dataset and stopping the training procedure once the performance on the test dataset has not improved after a fixed number of training iterations. It avoids overfitting by attempting to automatically select the inflection point where performance on the test dataset starts to decrease while performance on the training dataset continues to improve as the model starts to overfit. Although modest number of samples were used during training step of model development, the accuracy of the model was not degraded on external validation data suggesting that model was not overfitted.

### **Statistical Analysis**

Participant demographics are summarized as numbers (percentages) or median (25th to 75th percentile) for categorical and continuous variables, respectively. Between-group comparisons were performed using Pearson’s chi-squared test for categorical variables, and the Mann-Whitney independent samples test for numeric variables. As for power calculations<sup>22</sup>, Study Arm 1 was exploratory and served as the development set for C19-RS. In Study Arm 2, power calculations

were performed in advance, in order to define the sample size needed to recall for a follow up scan. We calculated that for COVID-19 positive patients in order to explore a delta in C19-RS values between baseline and follow-up scans of 1.7 with standard deviation of 2.3, we would require a sample size of 21. This sample size would offer us statistical power 0.9 to detect a difference of 1.7 arbitrary units (AU) in delta(C19-RS) between cases and controls, for SD 2.3 and  $\alpha=0.05$ . In Study Arm 3, we calculated that for a population of 250, of which a third would have high C19-RS values, we would be able to detect a minimum hazard ratio of 1.64 with power 0.9 and  $\alpha=0.05$ . For Study Arm 4, we calculated that for a hazard ratio of 3.31 taken from the internal test cohort, power 0.8 and alpha 0.05, we would require 22 events. Missing values within the datasets were imputed with predictive mean matching using the “mice” package. We further performed post-hoc exploratory subgroup analyses excluding variables with missingness greater than 10%. Statistical analyses were performed in the R environment (R version 3.6.0 and R Studio version 1.2.1335; COMBAT whole blood: R version 3.6.2, RStudio 1.2.5042 running on the BMRC compute cluster). All tests were two-sided and  $\alpha$  was set at 0.05. When C19-RS was measured, the outcomes data were collected and the statistical analysis took place as post-hoc investigation of prospectively collected data. Model development and reporting followed TRIPOD (transparent reporting of a multivariable prediction model for individual prediction or diagnosis) guidelines (**appendix p76**)<sup>23</sup>.

### *Study Arm 1*

Hierarchical clustering was performed using Ward’s method and Minkowski distance with p set to 10. Radiomic features that were retained after filtering (described above), were scaled and fit in an extreme gradient boosting algorithm. The method chosen was decision trees, with eta set to 0.5,

number of rounds 100, and maximum tree depth 50. The final product of the XGBoost algorithm was defined as C19-RS.

### *Study Arm 2*

Propensity score matching for age, sex, and BMI was performed to compare 22 COVID-19 patients with serial CCTA images and non-COVID-19 controls. Wilcoxon signed-rank test was used for paired comparisons, and unpaired Mann-Whitney U test was used for between groups comparisons.

### *Study Arm 3*

In the overall Study Arm 3 population we first assessed C19-RS' ability to detect COVID-19 in multivariable logistic regression. An optimal cut-off point for C19-RS was determined by the Youden's statistic method in receiver operating characteristic curve analysis. In the COVID positive population only (n=254) C19-RS' prognostic value for in-hospital death "due to" or "involving" COVID-19 as defined by the Office of National Statistics (ONS), and a composite endpoint of in-hospital death and intensive care unit (ICU) admission was assessed in receiver operating characteristic curves, univariate Kaplan–Meier curves, and logistic and Cox regression models adjusted for age above 65, sex, cardiovascular risk factors (hypertension, hyperlipidaemia, diabetes, BMI, presence of coronary artery disease), C-reactive protein plasma levels, white blood cell count, plasma troponin, history of chronic obstructive pulmonary disease and CT tube voltage. The optimal C19-RS cut-point for survival analyses was identified by the value that maximized the log-rank statistic for death in hospital. Correlation of C19-RS with C-reactive protein and length of hospital stay was assessed using Spearman's rho. Missingness was 29.7% for BMI,

10.4% for CRP, 54.4% for troponin and below 10% for the rest of the variables. In the COMBAT total RNAseq data, differential gene expression analysis was performed using the limma R package, co-expressed gene modules identified using WGCNA, and pathway enrichment assessed used GOBP annotations and hypergeometric test as previously described<sup>2</sup>. Correlation of gene modules with the C19-RS signature was quantified by Pearson's r.

#### *Study Arm 4*

C19-RS' prognostic value for in-hospital death and a composite endpoint of in-hospital death and intensive care unit (ICU) admission was assessed in Cox regression models adjusted as above. Missingness was 45.2% for BMI, 75% for Troponin, and below 10% for the rest of the variables.

## Online References

1. Marshall JC, Murthy S, Diaz J, et al. A minimal common outcome measure set for COVID-19 clinical research. *The Lancet Infectious Diseases* 2020; **20**(8): e192-e7.
2. A blood atlas of COVID-19 defines hallmarks of disease severity and specificity. *Cell* 2022.
3. Pertea G. fqtrim: v0. 9.4 release. 2015.
4. Kim D, Langmead B, Salzberg SL. HISAT: a fast spliced aligner with low memory requirements. *Nature methods* 2015; **12**(4): 357-60.
5. Cunningham F, Amode MR, Barrell D, et al. Ensembl 2015. *Nucleic Acids Res* 2015; **43**(Database issue): D662-9.
6. Liao Y, Smyth GK, Shi W. featureCounts: an efficient general purpose program for assigning sequence reads to genomic features. *Bioinformatics* 2014; **30**(7): 923-30.
7. Liao Y, Smyth GK, Shi W. The Subread aligner: fast, accurate and scalable read mapping by seed-and-vote. *Nucleic acids research* 2013; **41**(10): e108-e.
8. Picard Tools. version at 10.01.2016. <https://broadinstitute.github.io/picard/2020>).
9. Team RC. R: A language and environment for statistical computing. Vienna, Austria; 2013.
10. Robinson MD, McCarthy DJ, Smyth GK. edgeR: a Bioconductor package for differential expression analysis of digital gene expression data. *Bioinformatics* 2010; **26**(1): 139-40.
11. Warnes GR, Bolker B, Bonebakker L, et al. gplots: Various R Programming Tools for Plotting Data. R package version 3.0.4. 2020.
12. Quick J. nCoV-2019 sequencing protocol v3 (LoCost). 2020.
13. Loman N. Artic-network field bioinformatics: 1.2.1. 2021.
14. Pangolin software package.



15. Lang M, Som A, Mendoza DP, et al. Hypoxaemia related to COVID-19: vascular and perfusion abnormalities on dual-energy CT. *The Lancet Infectious Diseases* 2020.
16. van Griethuysen JJM, Fedorov A, Parmar C, et al. Computational Radiomics System to Decode the Radiographic Phenotype. *Cancer Res* 2017; **77**(21): e104-e7.
17. Oikonomou EK, Marwan M, Desai MY, et al. Non-invasive detection of coronary inflammation using computed tomography and prediction of residual cardiovascular risk (the CRISP CT study): a post-hoc analysis of prospective outcome data. *Lancet (London, England)* 2018; **392**: 929-39.
18. Schlett CL, Massaro JM, Lehman SJ, et al. Novel measurements of periaortic adipose tissue in comparison to anthropometric measures of obesity, and abdominal adipose tissue. *International journal of obesity* 2009; **33**(2): 226-32.
19. Okayama S, Soeda T, Takami Y, et al. The influence of effective energy on computed tomography number depends on tissue characteristics in monoenergetic cardiac imaging. *Radiology research and practice* 2012; **2012**.
20. RIDER. The Reference Image Database to Evaluate Therapy Response. 2013.
21. Kadiyala A, Kumar A. Applications of python to evaluate the performance of decision tree-based boosting algorithms. *Environmental Progress & Sustainable Energy* 2018; **37**(2): 618-23.
22. Dupont WD, Plummer Jr WD. Power and sample size calculations: a review and computer program. *Controlled clinical trials* 1990; **11**(2): 116-28.
23. Moons KG, Altman DG, Reitsma JB, et al. Transparent Reporting of a multivariable prediction model for Individual Prognosis or Diagnosis (TRIPOD): explanation and elaboration. *Annals of internal medicine* 2015; **162**(1): W1-W73.

## Online Figures

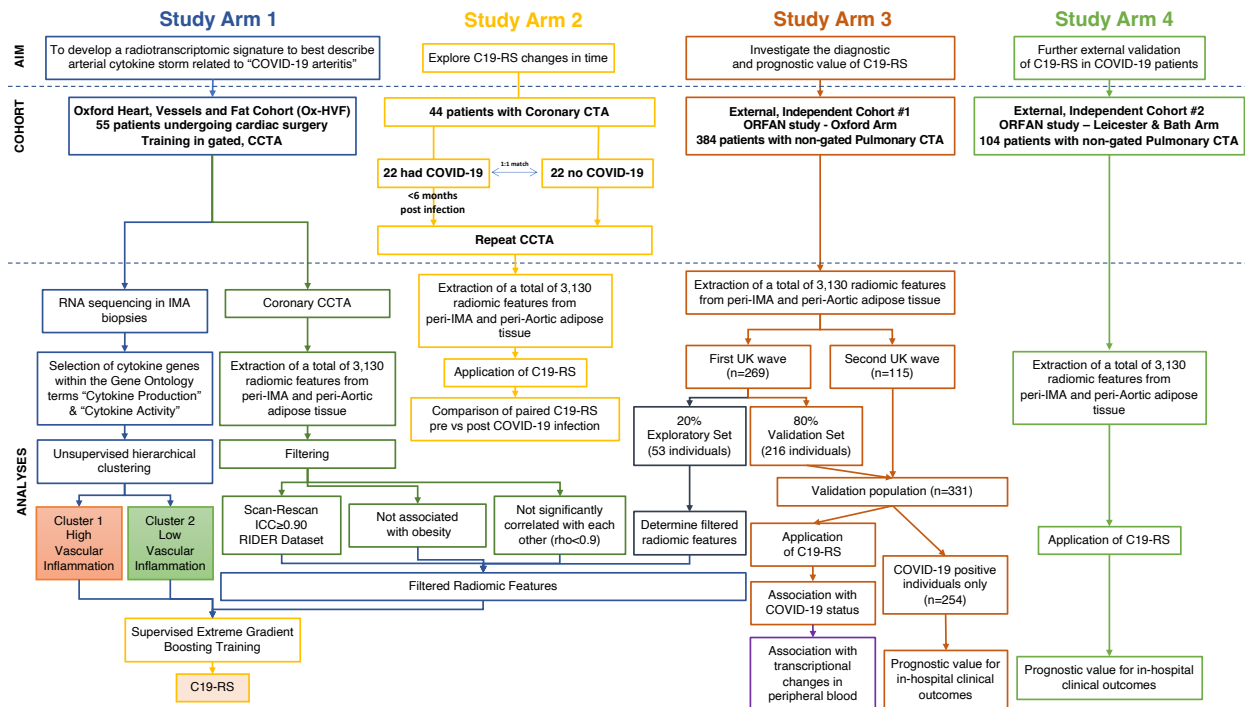

**Online Figure 1 | Workflow Diagram.** Study Arm 1 utilised 55 patients from the Oxford Heart Vessels and Fat (Ox-HVF) Cohort that underwent cardiac surgery and CCTA imaging in order to develop the radiomic signature C19-RS based on high vascular inflammation. Study Arm 2 included 88 paired CCTA scans. Study Arm 3 included 384 participants with CTPA imaging and was used for radiomic feature filtering and to validate C19-RS for COVID-19 discrimination (COVID-19 positive and negative individuals, n=331) and in-hospital outcome correlation (COVID-19 positive individuals only, n=254). Study Arm 4 served as an external, independent validation cohort of COVID-19 patients testing the prognostic value of C19-RS for in-hospital outcomes.

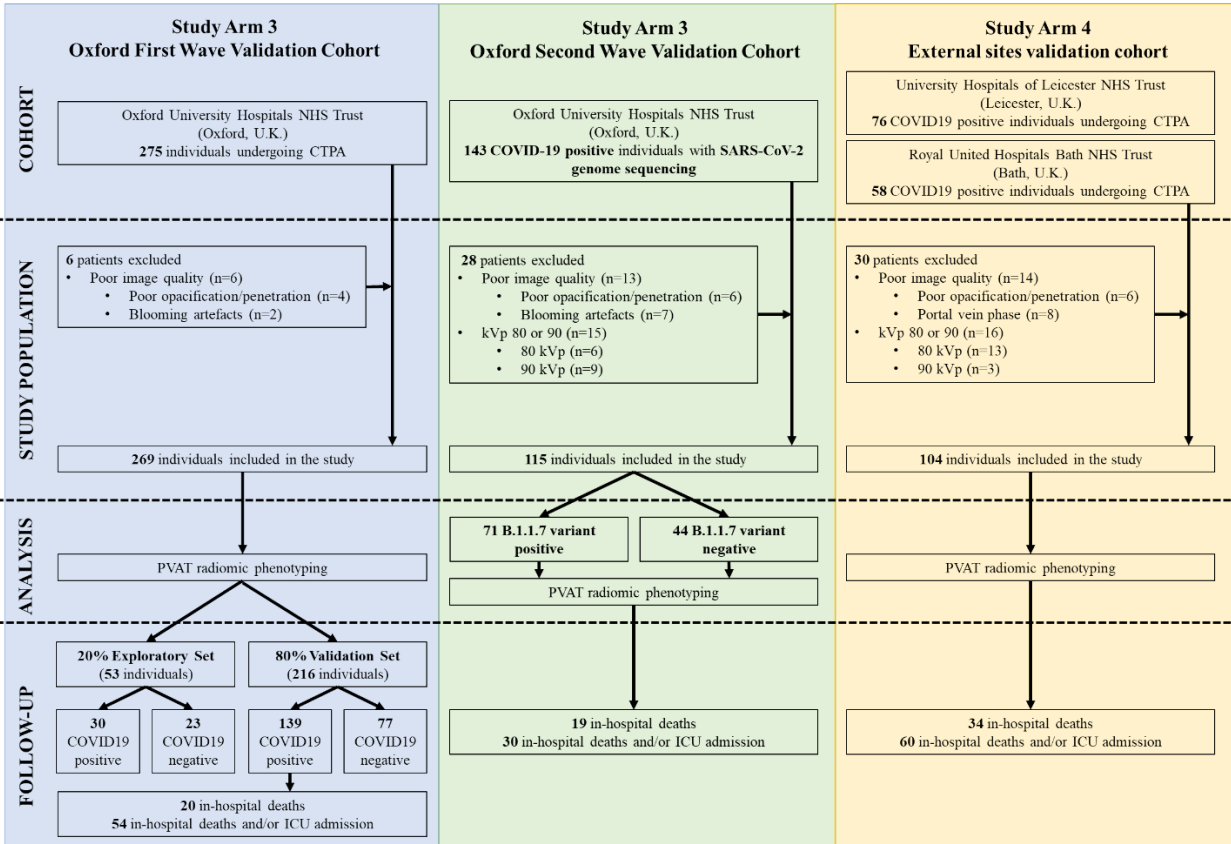

Online Figure 2 | Image analysis and in-hospital outcomes collection diagram for Study Arms

3 & 4. ICU: Intensive care unit.

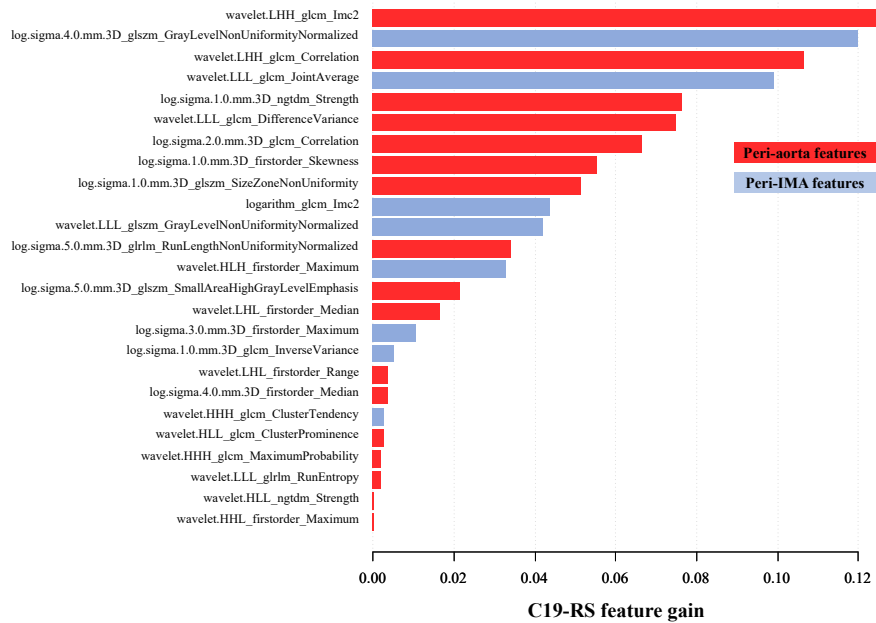

**Online Figure 3 | Features gain in C19-RS.** C19-RS consists of 25 features, 8 peri-IMA radiomic and 17 peri-aorta features. Gain values represent the relative contribution of each radiomic feature to C19-RS. A higher gain value when compared to another feature implies higher importance for generating a prediction value. A full list of radiomic features is presented in **appendix p 39**.

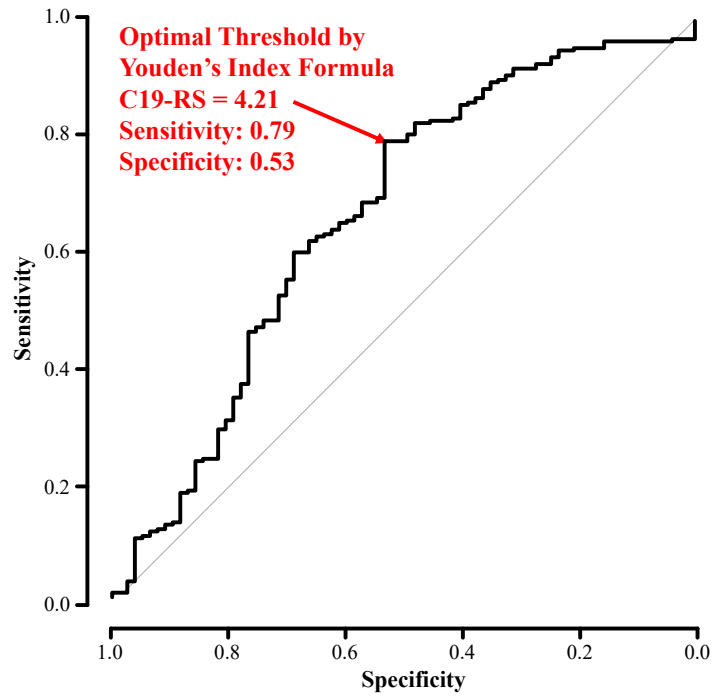

**Online Figure 4 | Optimal C19-RS cut-off for COVID-19 detection.** Receiver operating characteristic curve, area under the curve (0.65 [95%CI: 0.57-0.73],  $p < 0.001$ ) and optimal cut-off point of C19-RS for COVID-19 detection in COVID-19 negative and positive patients from the validation Study Arm 3 population (n=331).

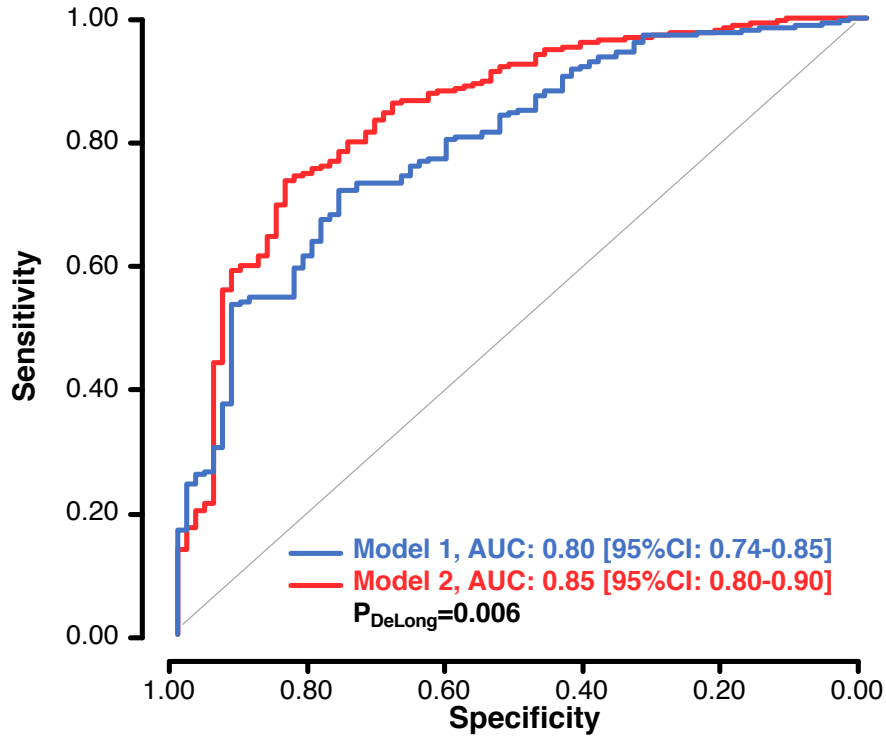

**Online Figure 5 | Incremental value of C19-RS radiomic features in COVID-19 detection.**

Receiver operating characteristic curves of two logistic regression models showing that addition of the top third (n=8) of radiomic features comprising C19-RS significantly improved the performance of a baseline model consisting of age, sex, cardiovascular risk factors (hypertension, hyperlipidaemia, diabetes, BMI, presence of coronary artery disease), C-reactive protein plasma levels, white blood cell count, plasma troponin, and history of chronic obstructive pulmonary disease for COVID-19 detection. P values derived from the DeLong test of areas under the curve for model 1 (age, sex, hypertension, hyperlipidaemia, diabetes, BMI, presence of coronary artery disease, C-reactive protein plasma levels, white blood cell count, plasma troponin, and history of chronic obstructive pulmonary disease) and model 2 (model 1 plus eight C19-RS radiomic features with the highest gain values).

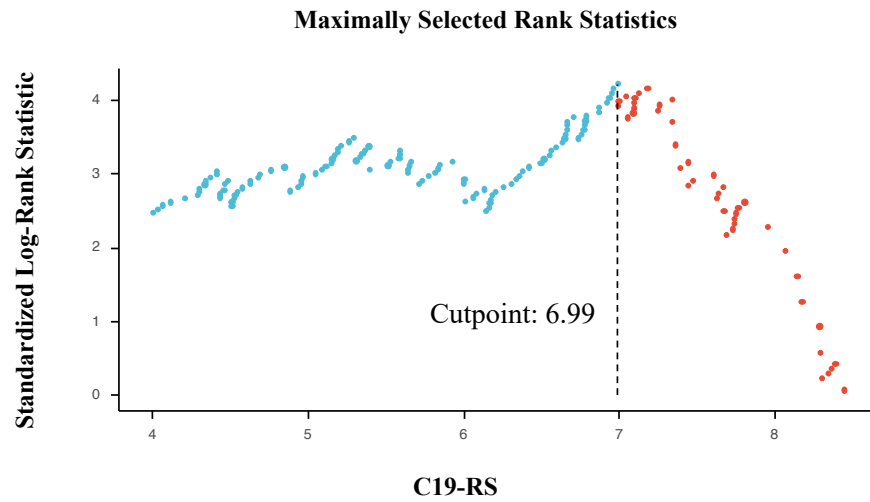

**Online Figure 6 | Identifying the optimal C19-RS cut-off for in-hospital death prediction.**

Plot of the standardized log-rank statistic for prediction of death in-hospital versus different cut-off points for C19-RS, showing optimal discrimination for a cut-off point of 6.99, in the COVID-19 positive Study Arm 3 population (n=254).

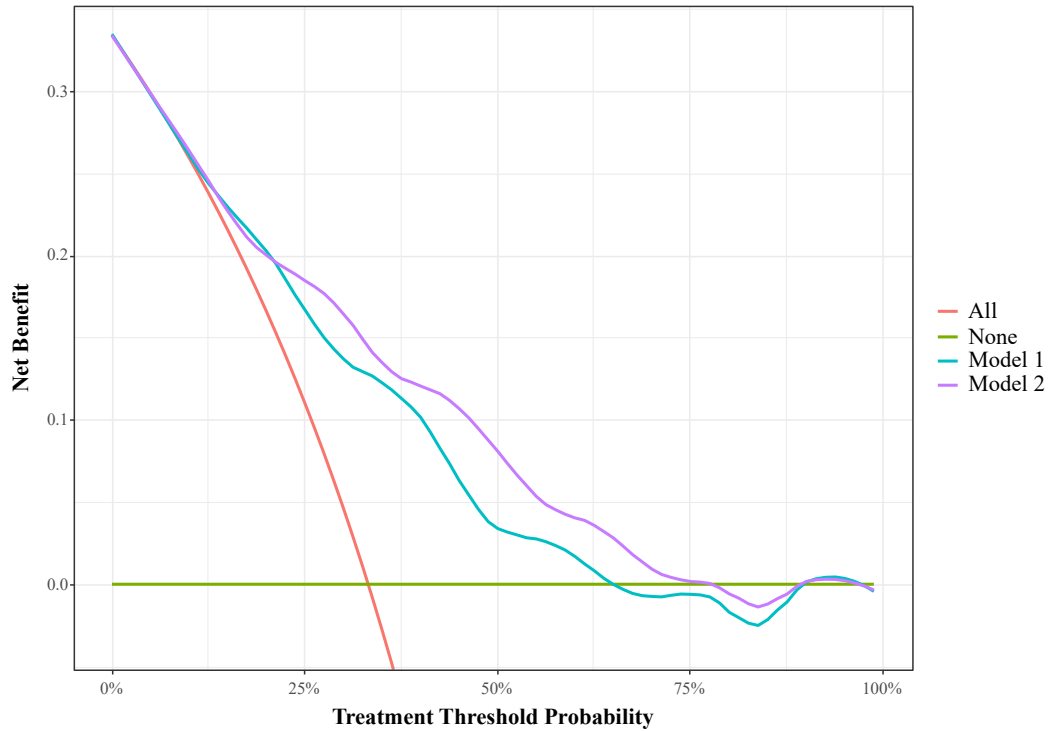

**Online Figure 7 | Decision curve analysis.** Plot of decision curve analysis for composite endpoint prediction for each model. Model 1 (blue line) consists of demographic variables age, sex, hypertension (HTN), hyperlipidaemia (HLD), diabetes mellitus (DM), body mass index (BMI), presence of coronary artery disease (CAD), history of chronic obstructive pulmonary disease (COPD), tube voltage, and biochemistry biomarkers white blood cell count (WBC), C-reactive protein (CRP), and plasma troponin (Tn). Model 2 (purple line) includes all parameters in model 1 plus C19-RS. The y-axis measures net benefit, calculated by summing the benefits (true positives) and subtracting the harms (false positives), in which the latter are weighted by a factor related to the relative harm of a missed cancer compared with the harm of an unnecessary biopsy.



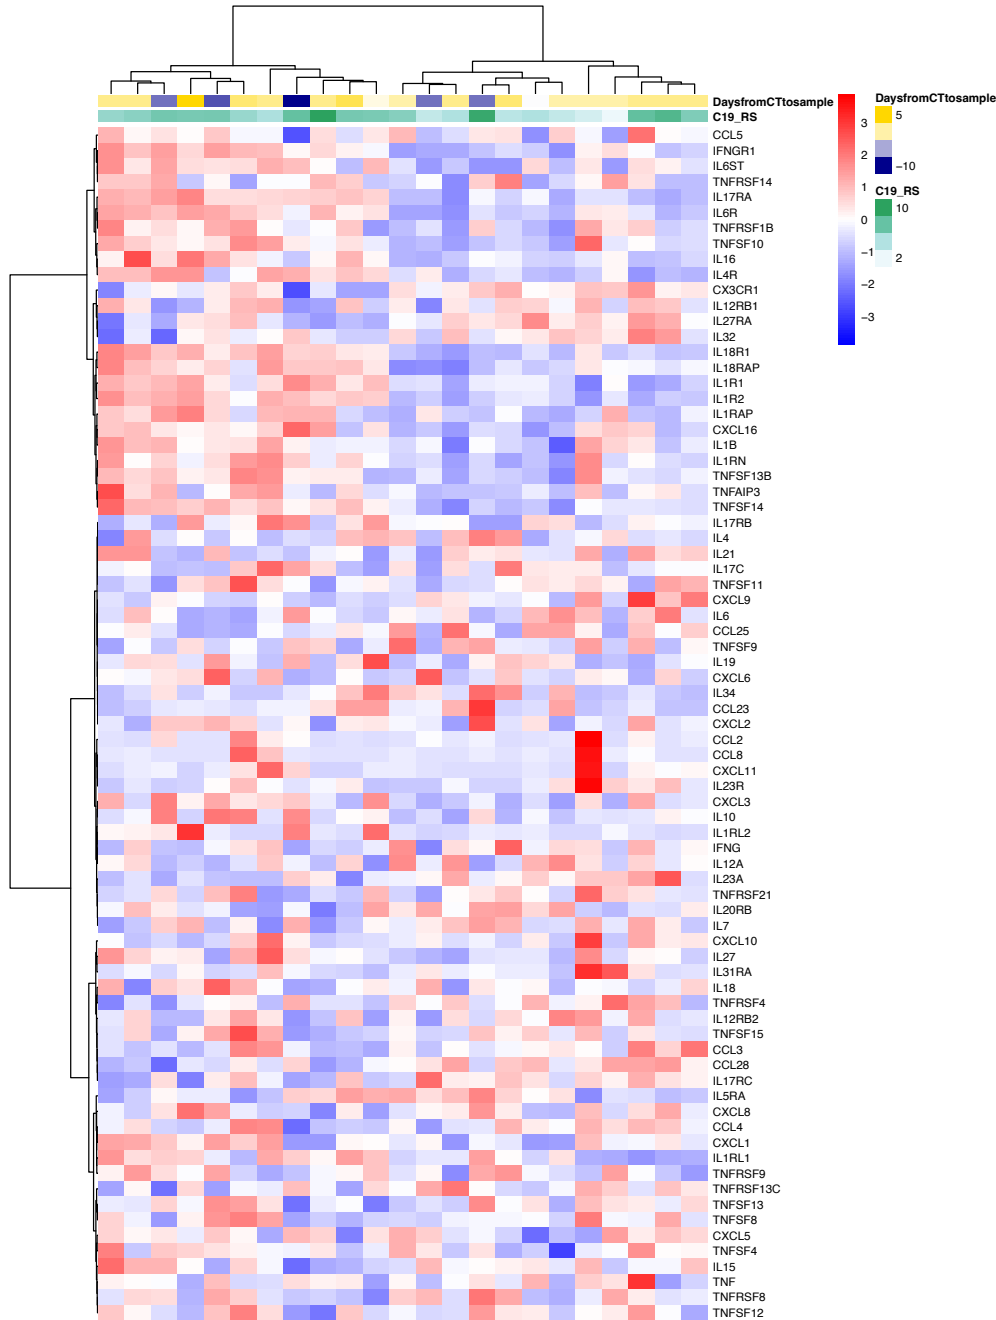

**Online Figure 8 | Unsupervised hierarchical clustering of the inflammatory genes in whole blood in the COMBAT dataset.** The scaled expression of the 77 genes retained after filtering is visualised for the closest sample per patient to the CT scan. Hierarchical clustering separates the patients into 2 clusters with no clear association with C19-RS.

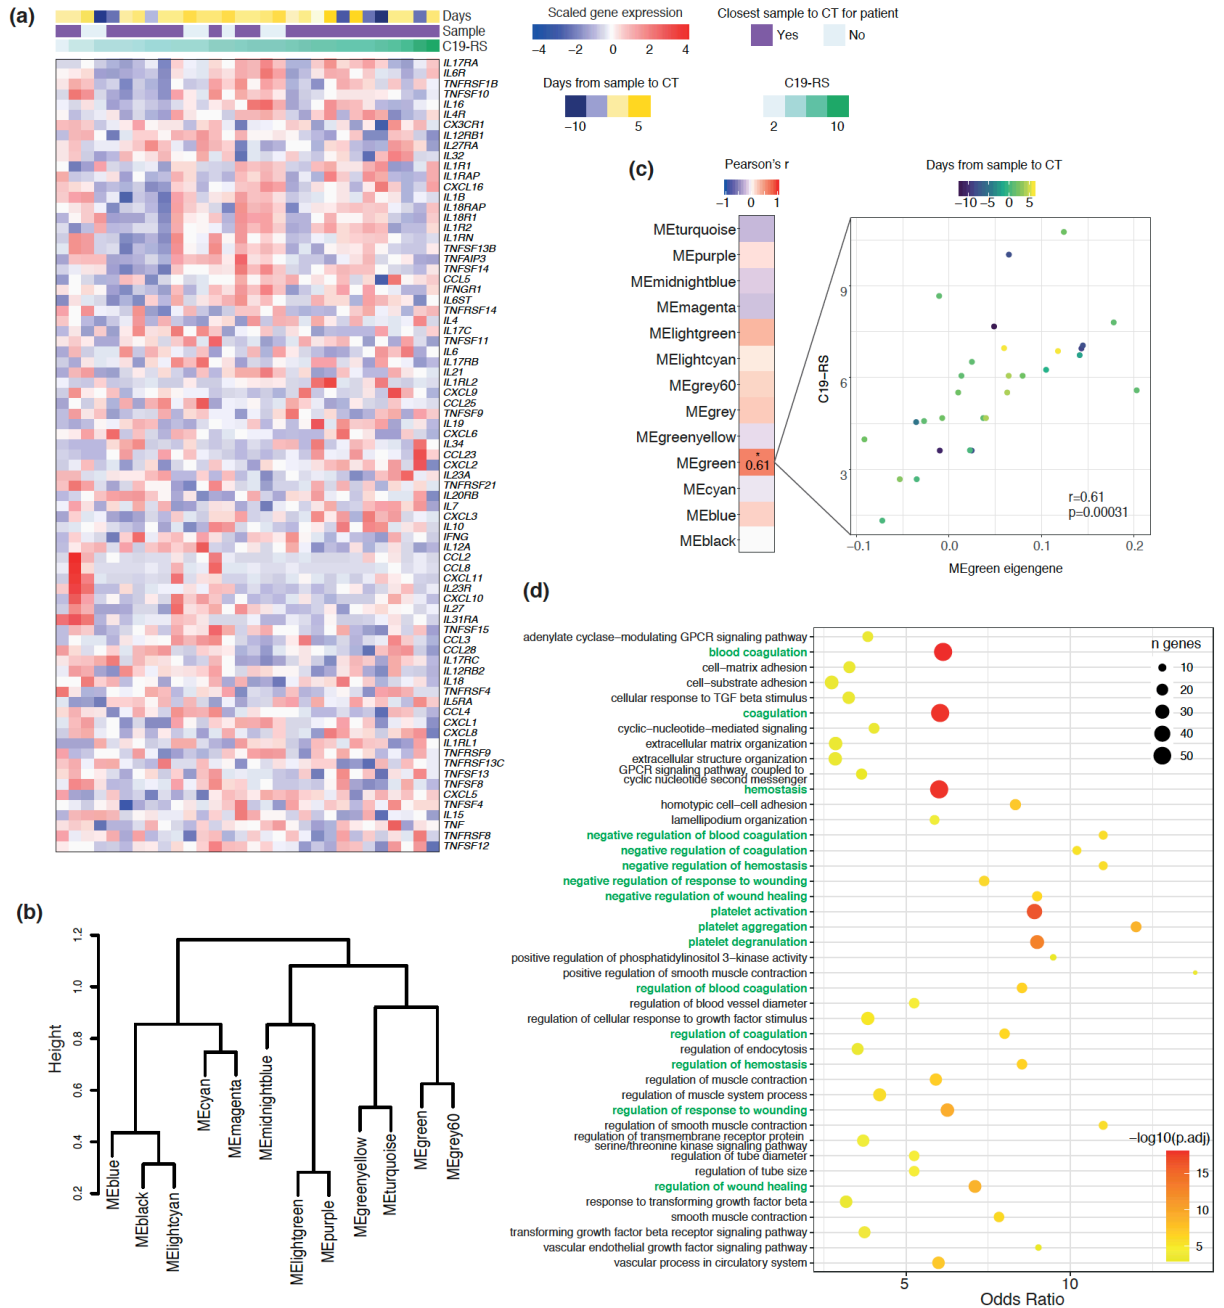

**Online Figure 9 | Whole blood gene expression profiles and C19-RS.** (a) Expression of the inflammation-related gene set in the COMBAT whole blood RNAseq dataset (30 samples from 23 COVID-19 patients from Study Arm 3 with CT scans, 77 genes detected). Samples are ordered by C19-RS, genes are clustered using Ward's method and Minkowski distance. Colour bar indicates sample timing and C19-RS. (b) Weighted Gene Correlation Network Analysis (WGCNA) on the

full COMBAT dataset defined gene expression modules<sup>2</sup>. Unassigned genes were categorised as MEgrey. (c) Correlation between C19-RS and the MEgreen eigengene by Pearson's  $r$ . (d) GOBP pathway enrichment analysis for MEgreen module member genes using hypergeometric test (terms with adjusted p-value  $<0.001$  shown, full results in **appendix pp 65-67**). X axis (odds ratio) indicates strength of association between pathway and module memberships, size of point (n genes) indicates number of genes with overlapping membership, colour of points (adjusted p value) indicates significance of association.

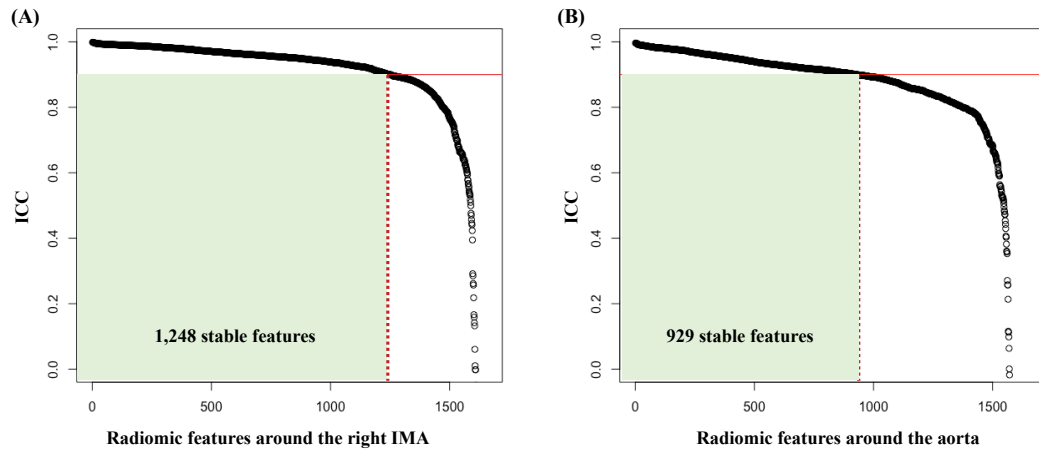

**Online Figure 10 | Reproducibility analysis of perivascular adipose tissue features.** Plot of the test-retest intraclass correlation coefficient (ICC) in the RIDER dataset of all 1,655 radiomic features measured around the right IMA (A) and descending aorta (B). Radiomic features are ranked on descending order based on their ICC value. A total of 1,248 and 929 radiomic features respectively were found to have an ICC equal to or greater than 0.90.

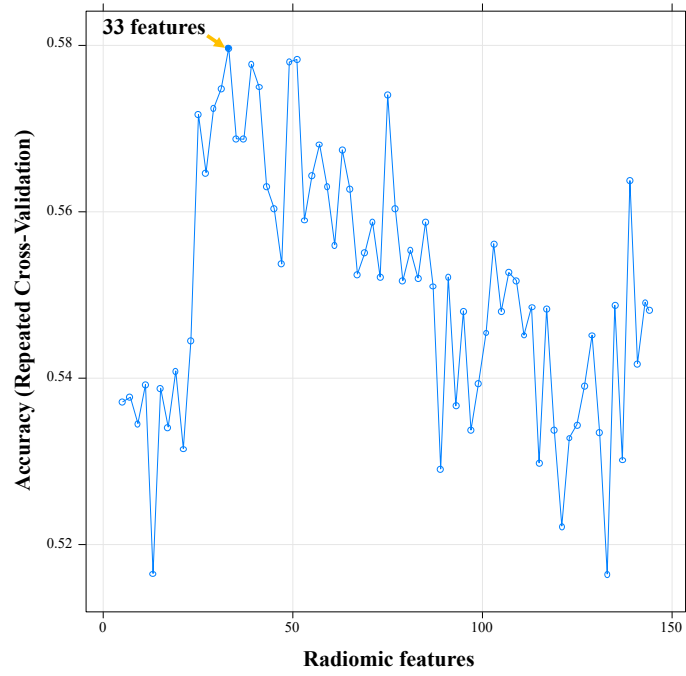

**Online Figure 11 | Recursive feature elimination.** Recursive feature elimination with a random forest algorithm and repeated five-fold cross-validation showed a plateau in the accuracy of the trained model with a maximal number of 33 selected features.

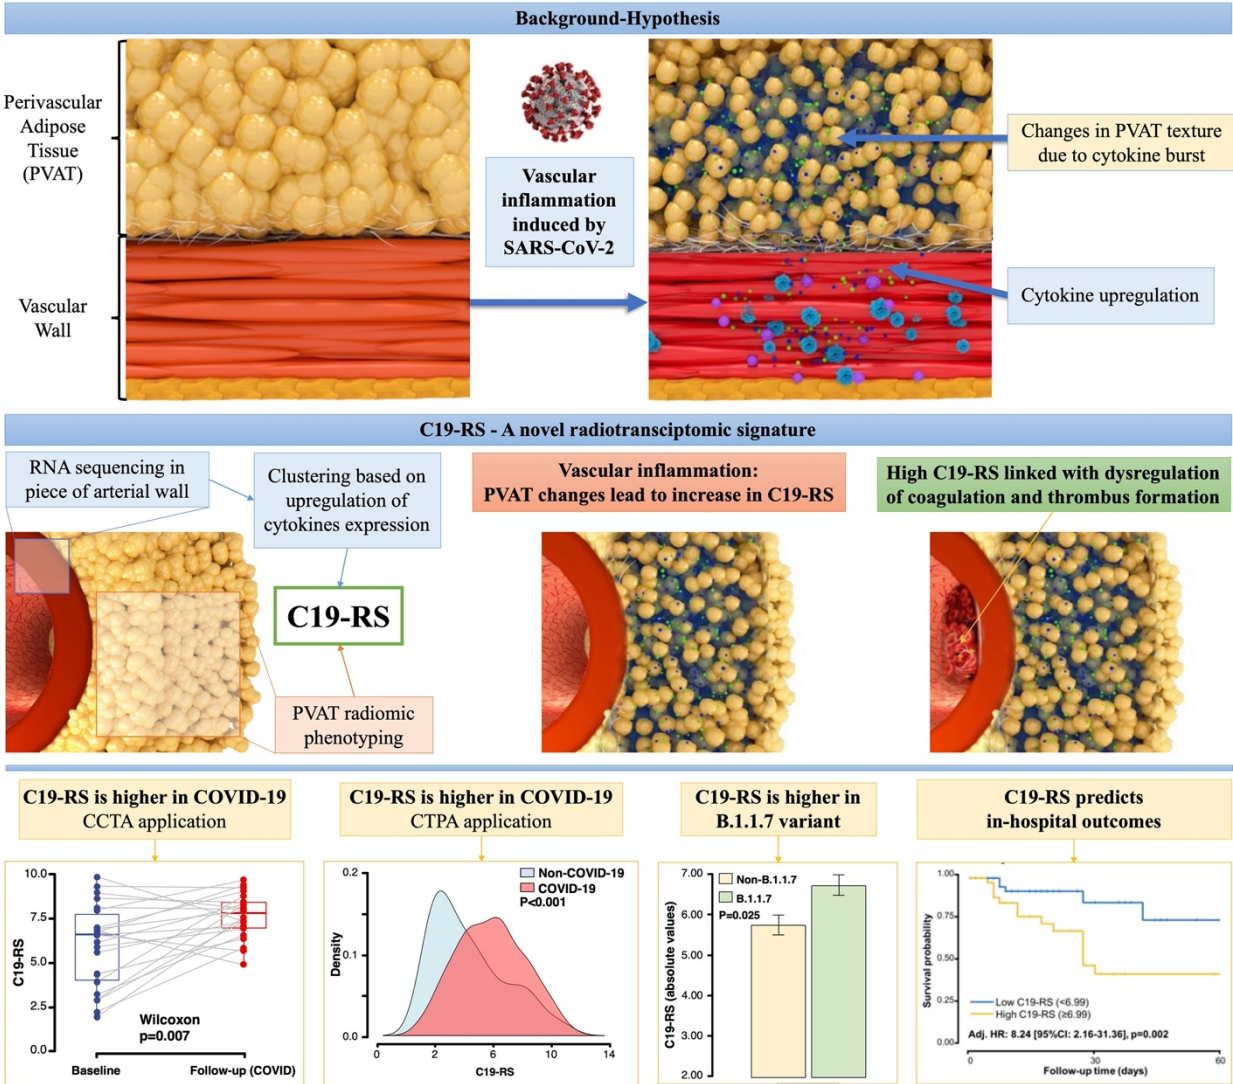

**Online Figure 12 | The proposed imaging biomarker C19-RS.** Vascular inflammation induced by the SARS-CoV-2 virus causes structural changes to perivascular adipose tissue. Utilising RNA sequencing data, a novel imaging biomarker -namely C19-RS- was trained to reflect upregulation of cytokine related genes in the arterial wall. C19-RS was higher in COVID-19 positive patients, particularly in those with the B.1.1.7 variant, and had significant prognostic value for in-hospital death prediction.

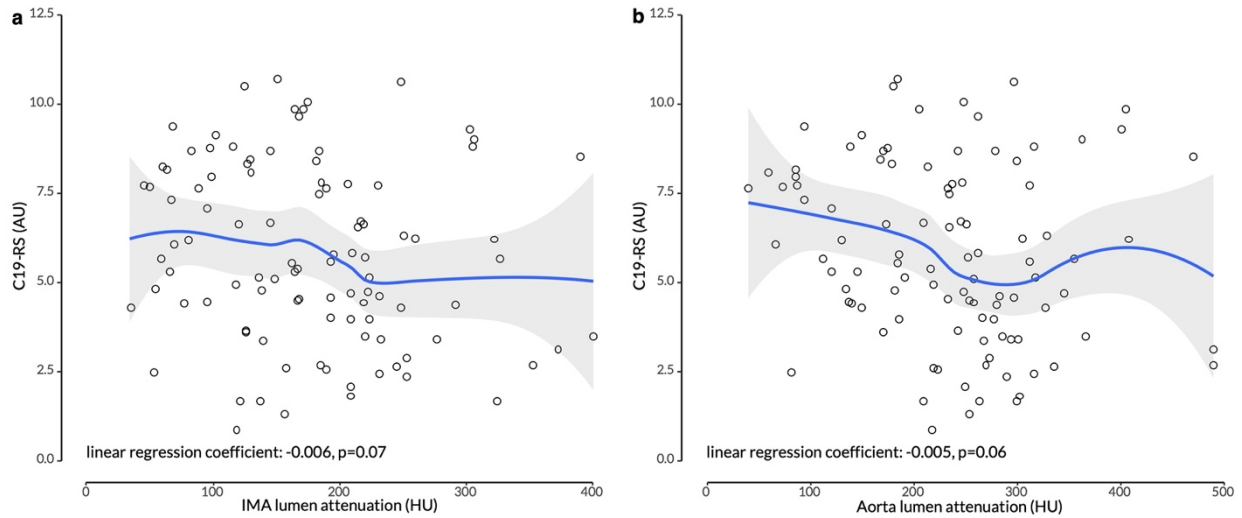

**Online Figure 13 | Lumen attenuation and C19-RS.** We tested lumen attenuation values in 100 consecutive patients from the Study Arm 3 population. C19-RS did not significantly correlate with either internal mammary artery (IMA) lumen attenuation (a) or thoracic aorta lumen attenuation (b) values. Linear regression models were fitted with C19-RS being the dependent variable and lumen attenuation values the independent variable for panels a and b respectively.

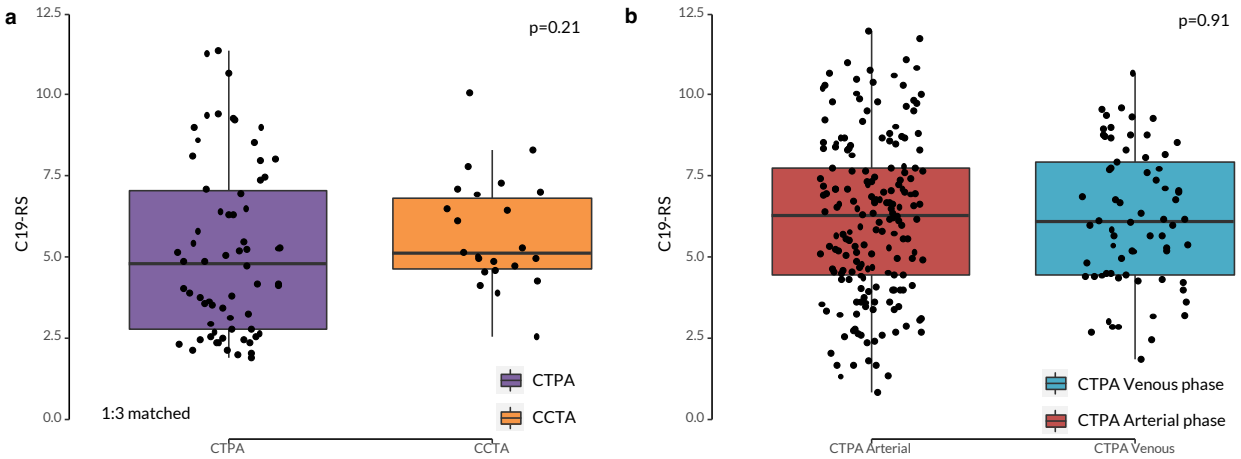

**Online Figure 14 | C19-RS in CCTA vs CTPA and different CTPA phases.** (a) We matched 22 COVID-19 negative patients undergoing coronary CTA from Study Arm 2 with 66 COVID-19 negative patients from Study Arm 3 undergoing pulmonary CTA, matched for age, sex, BMI, hypertension, and diabetes. No significant difference was observed in absolute C19-RS values between the two imaging protocols. P value derived from the Mann-Whitney U test. (b) We further analysed quantitatively CTPAs in Study Arm 3 in order to stratify the cohort by CTPA phase (CTPA arterial phase: good visual contrast penetration vs CTPA venous phase: poor visual contrast penetration). No difference in C19-RS was observed. P value derived from the Mann-Whitney U test. We have further performed an additional sensitivity analysis in which we have included the phase as a co-variate in the prognostic modelling in Study Arm 3. Indeed, there was no impact of this parameter on the prognostic value of C19RS. (C19-RS Adj. HR 3.37 [95%CI: 1.64-6.93,  $p < 0.001$ ], adjusted for age above 65, sex, cardiovascular risk factors (hypertension, hyperlipidaemia, diabetes, BMI, presence of coronary artery disease), C-reactive protein plasma levels, white blood cell count, plasma troponin, history of chronic obstructive pulmonary disease, CT tube voltage, and CTPA phase).



**Online Table 1. List of genes chosen for unsupervised clustering in Study Arm 1**

|        |        |         |        |           |
|--------|--------|---------|--------|-----------|
| CCL1   | CXCL13 | IFNL4   | IL1RL2 | IL6R      |
| CCL11  | CXCL14 | IFNW1   | IL1RN  | IL6ST     |
| CCL13  | CXCL16 | IL10    | IL2    | IL7       |
| CCL14  | CXCL17 | IL11    | IL20   | IL9       |
| CCL15  | CXCL2  | IL12A   | IL20RB | TNF       |
| CCL16  | CXCL3  | IL12B   | IL21   | TNFAIP3   |
| CCL17  | CXCL5  | IL12RB1 | IL22   | TNFRSF11B |
| CCL18  | CXCL6  | IL12RB2 | IL23A  | TNFRSF13C |
| CCL19  | CXCL8  | IL13    | IL23R  | TNFRSF14  |
| CCL2   | CXCL9  | IL15    | IL24   | TNFRSF1B  |
| CCL20  | IFNA1  | IL16    | IL25   | TNFRSF21  |
| CCL21  | IFNA10 | IL17A   | IL26   | TNFRSF4   |
| CCL22  | IFNA14 | IL17B   | IL27   | TNFRSF8   |
| CCL23  | IFNA16 | IL17C   | IL27RA | TNFRSF9   |
| CCL24  | IFNA17 | IL17D   | IL3    | TNFSF10   |
| CCL25  | IFNA2  | IL17F   | IL31   | TNFSF11   |
| CCL26  | IFNA21 | IL17RA  | IL31RA | TNFSF12   |
| CCL27  | IFNA4  | IL17RB  | IL32   | TNFSF13   |
| CCL28  | IFNA5  | IL17RC  | IL33   | TNFSF13B  |
| CCL3   | IFNA6  | IL18    | IL34   | TNFSF14   |
| CCL4   | IFNA7  | IL18R1  | IL36A  | TNFSF15   |
| CCL5   | IFNA8  | IL18RAP | IL36B  | TNFSF18   |
| CCL7   | IFNB1  | IL19    | IL36G  | TNFSF4    |
| CCL8   | IFNE   | IL1A    | IL36RN | TNFSF8    |
| CX3CL1 | IFNG   | IL1B    | IL37   | TNFSF9    |
| CX3CR1 | IFNGR1 | IL1F10  | IL4    |           |
| CXCL1  | IFNK   | IL1R1   | IL4R   |           |
| CXCL10 | IFNL1  | IL1R2   | IL5    |           |
| CXCL11 | IFNL2  | IL1RAP  | IL5RA  |           |
| CXCL12 | IFNL3  | IL1RL1  | IL6    |           |

**Online Table 2. Demographic characteristics of the Study Arm 1 population.**

|                                           | Study Arm 1 population |                 |                 | P value |
|-------------------------------------------|------------------------|-----------------|-----------------|---------|
|                                           | All                    | Cluster 1       | Cluster 2       |         |
| <b>Total (n)</b>                          | <b>55</b>              | <b>28</b>       | <b>27</b>       | -       |
| <b>Age (years)</b>                        | 68.5[61.0-75.0]        | 68.0[58.8-75.0] | 70.5[64.0-75.8] | 0.467   |
| <b>Sex (male, %)</b>                      | 85.5                   | 85.7            | 85.2            | 0.564   |
| <b>Risk factors (%)</b>                   |                        |                 |                 |         |
| Hypertension                              | 70.9                   | 60.7            | 81.5            | 0.087   |
| Dyslipidaemia                             | 80.0                   | 75.0            | 85.2            | 0.263   |
| Diabetes mellitus                         | 16.4                   | 14.3            | 18.5            | 0.524   |
| Smoking                                   | 56.4                   | 57.2            | 55.5            | 0.928   |
| Systolic blood pressure (mmHg)            | 130.02+/-17.92         | 129.19+/-19.48  | 130.92+/-16.42  | 0.731   |
| Body Mass Index (BMI, kg/m <sup>2</sup> ) | 27.82+/-4.21           | 27.14+/-4.63    | 28.52+/-3.68    | 0.236   |
| <b>Medication (%)</b>                     |                        |                 |                 |         |
| Statins                                   | 87.3                   | 85.7            | 88.9            | 0.913   |
| ACEi                                      | 63.6                   | 57.1            | 70.4            | 0.360   |
| b-blockers                                | 72.7                   | 75.0            | 70.4            | 0.924   |
| Nitrates                                  | 54.5                   | 60.7            | 48.1            | 0.597   |
| <b>CT Scanning data</b>                   |                        |                 |                 |         |
| Scan type                                 | CCTA                   | CCTA            | CCTA            |         |
| Tube Voltage (kVp) n (%)                  |                        |                 |                 |         |
| 100                                       | 2                      | 1               | 1               | 1       |
| 120                                       | 53                     | 27              | 26              | 1       |

ACEi=angiotensin converting enzyme inhibitors; continuous variables reported as means+/-SEM or median [IQR], as appropriate. CCTA: Gated coronary computed tomography angiography.

| <b>Criteria</b> |                                                                                                                                                                                                                                                           | <b>Points</b> | <b>Comments</b>                                                                                                                                                                                                                                                                                   |
|-----------------|-----------------------------------------------------------------------------------------------------------------------------------------------------------------------------------------------------------------------------------------------------------|---------------|---------------------------------------------------------------------------------------------------------------------------------------------------------------------------------------------------------------------------------------------------------------------------------------------------|
| <b>1</b>        | Image protocol quality - well-documented image protocols (for example, contrast, slice thickness, energy, etc.) and/or usage of public image protocols allow reproducibility/replicability                                                                | 1/2           | All image protocols documented clearly on Online Appendix                                                                                                                                                                                                                                         |
| <b>2</b>        | Multiple segmentations - possible actions are: segmentation by different physicians/algorithms/software, perturbing segmentations by (random) noise, segmentation at different breathing cycles. Analyse feature robustness to segmentation variabilities | 1/1           | Three-dimensional segmentation performed by two independent analysts. Scan-rescan stability assessment of all 3,310 radiomic features done against the RIDER dataset.                                                                                                                             |
| <b>3</b>        | Phantom study on all scanners - detect inter-scanner differences and vendor-dependent features. Analyse feature robustness to these sources of variability                                                                                                | 0/1           | No phantom studies performed.                                                                                                                                                                                                                                                                     |
| <b>4</b>        | Imaging at multiple time points - collect images of individuals at additional time points. Analyse feature robustness to temporal variabilities (for example, organ movement, organ expansion/shrinkage)                                                  | 1/1           | Imaging at multiple time points given in Figure 4.                                                                                                                                                                                                                                                |
| <b>5</b>        | Feature reduction or adjustment for multiple testing - decreases the risk of overfitting. Overfitting is inevitable if the number of features exceeds the number of samples. Consider feature robustness when selecting features                          | 3/3           | Feature reduction performed against scan-rescan stability, and interobserver consistency. In addition, radiomic features that were significantly correlated with BMI and total intrathoracic adipose tissue were removed.                                                                         |
| <b>6</b>        | Multivariable analysis with non radiomics features (for example, EGFR mutation) - is expected to provide a more holistic model. Permits correlating/inferencing between radiomics and non radiomics features                                              | 1/1           | All models adjusted for age, sex, cardiovascular risk factors (hypertension, hyperlipidaemia, diabetes, BMI, presence of coronary artery disease), C-reactive protein plasma levels, white blood cell count, plasma troponin, history of chronic obstructive pulmonary disease, and tube voltage. |
| <b>7</b>        | Detect and discuss biological correlates - demonstration of phenotypic differences (possibly associated with underlying gene-protein expression patterns) deepens understanding of radiomics and biology                                                  | 1/1           | Biological meaning of radiomic features within C19-RS given in Figure 4a.                                                                                                                                                                                                                         |
| <b>8</b>        | Cut-off analyses - determine risk groups by either the median, a previously published cut-off or report a continuous risk variable. Reduces the risk of reporting overly optimistic results                                                               | 1/1           | C19-RS cut-off of 6.99 identified by the value that maximized the log-rank statistic for death in hospital.                                                                                                                                                                                       |

|                                     |                                                                                                                                                                                                                                                                                               |     |                                                                                                                                                                                                                                  |
|-------------------------------------|-----------------------------------------------------------------------------------------------------------------------------------------------------------------------------------------------------------------------------------------------------------------------------------------------|-----|----------------------------------------------------------------------------------------------------------------------------------------------------------------------------------------------------------------------------------|
| 9                                   | Discrimination statistics - report discrimination statistics (for example, C-statistic, ROC curve, AUC) and their statistical significance (for example, p-values, confidence intervals). One can also apply resampling method (for example, bootstrapping, cross-validation)                 | 2/2 | Discrimination statistics and ROC curves for C19-RS presented in Figure 5a.                                                                                                                                                      |
| 10                                  | Calibration statistics - report calibration statistics (for example, Calibration-in-the-large/slope, calibration plots) and their statistical significance (for example, P-values, confidence intervals). One can also apply resampling method (for example, bootstrapping, cross-validation) | 1/2 | C19-RS feature selection performed by recursive feature elimination with a random forest algorithm and repeated five-fold cross-validation.                                                                                      |
| 11                                  | Prospective study registered in a trial database - provides the highest level of evidence supporting the clinical validity and usefulness of the radiomics biomarker                                                                                                                          | 7/7 | Ongoing C19-RS validation/testing in the RECOVERY trial (NCT04381936).                                                                                                                                                           |
| 12                                  | Validation - the validation is performed without retraining and without adaptation of the cut-off value, provides crucial information with regard to credible clinical performance                                                                                                            | 5/5 | External validation based on three datasets from distinct institutes (Oxford, Bath, Leicester).                                                                                                                                  |
| 13                                  | Comparison to 'gold standard' - assess the extent to which the model agrees with/is superior to the current 'gold standard' method (for example, TNM-staging for survival prediction). This comparison shows the added value of radiomics                                                     | 2/2 | Presented in Figure 5b.                                                                                                                                                                                                          |
| 14                                  | Potential clinical utility - report on the current and potential application of the model in a clinical setting (for example, decision curve analysis).                                                                                                                                       | 2/2 | A decision curve analysis is presented in Online Figure 6.                                                                                                                                                                       |
| 15                                  | Cost-effectiveness analysis - report on the cost-effectiveness of the clinical application (for example, QALYs generated)                                                                                                                                                                     | 0/1 | No within the scope of this study.                                                                                                                                                                                               |
| 16                                  | Open science and data - make code and data publicly available. Open science facilitates knowledge transfer and reproducibility of the study                                                                                                                                                   | 0/4 | Individual participant-level data used for this report are not publicly available, because they contain protected patient health information. Requests for data access should be directed to the corresponding author via email. |
| <b>Total points (28/36 = 77.8%)</b> |                                                                                                                                                                                                                                                                                               |     |                                                                                                                                                                                                                                  |

**Online Table 4. Demographic characteristics of the Study Arm 2 population.**

|                                      | Study Arm 2 population |                   |                   | P value |
|--------------------------------------|------------------------|-------------------|-------------------|---------|
|                                      | All                    | COVID             | Controls          |         |
| <b>Total (n)</b>                     | <b>44</b>              | <b>22</b>         | <b>22</b>         | -       |
| <b>Age (years)</b>                   | 57.5 [48.0, 63.3]      | 58.0 [48.8, 66.0] | 56.5 [48.3, 62.8] | 0.518   |
| <b>Sex (male, %)</b>                 | 72.7                   | 72.7              | 72.7              | 1       |
| <b>Risk factors (%)</b>              |                        |                   |                   |         |
| Hypertension                         | 50.0                   | 50.0              | 50.0              | 1       |
| Diabetes mellitus                    | 25.0                   | 18.2              | 31.8              | 0.486   |
| Body Mass Index (kg/m <sup>2</sup> ) | 32.4+/-6.3             | 32.5+/-7.7        | 32.3+/-4.7        | 0.911   |
| <b>COVID severity</b>                |                        |                   |                   |         |
| Mild                                 | -                      | 40.9%             | -                 | -       |
| Moderate                             | -                      | 36.4%             | -                 | -       |
| Severe                               | -                      | 13.6%             | -                 | -       |
| Critical                             | -                      | 9.1%              | -                 | -       |
| <b>C19-RS Baseline</b>               | 5.9 [4.5, 6.9]         | 6.5 [3.9, 7.6]    | 5.1 [4.6, 6.8]    | 0.453   |
| <b>C19-RS Follow-up</b>              | 6.6 [4.7, 8.0]         | 7.7 [6.9, 8.3]    | 4.6 [3.7, 6.6]    | <0.001  |
| <b>Delta C19-RS</b>                  | -                      | 1.7 [-0.1, 3.2]   | -0.3 [-1.8, 0.9]  | 0.005   |
| <b>Time between scans (years)</b>    | -                      | 2.2 [1.8, 4.1]    | 4.3 [4.1, 4.4]    | 0.002   |

Continuous variables reported as means+/-SEM or median [IQR], as appropriate. Factor variables are presented as percentages. Delta C19-RS describes the difference in C19-RS between baseline and follow-up scanning.

Online Table 5. Demographic characteristics of the Study Arm 3 population.

|                                                     | First UK Wave          |                  |                        |                   | Second UK Wave |                    |
|-----------------------------------------------------|------------------------|------------------|------------------------|-------------------|----------------|--------------------|
|                                                     | Strata by random split |                  | Strata by COVID status |                   | All            |                    |
|                                                     | Exploratory (20%)      | Validation (80%) | COVID                  | Non-COVID         | p value        | Validation (100%)  |
|                                                     | N=53                   | N=216            | N=169                  | N=100             |                | N=115              |
| <b>Age (years)</b>                                  | 63.4[50.7-76.0]        | 57.9[46.6-74.0]  | 60.0 [51.1-75.7]       | 53.2 [40.1-69.8]  | 0.001          | 62.7 [51.6-75.6]   |
| <b>Sex (male, %)</b>                                | 26 (49.1)              | 95 (44.0)        | 96 (56.8)              | 42 (46.7)         | 0.154          | 72 (62.6)          |
| <b>Risk factors, n (%)</b>                          |                        |                  |                        |                   |                |                    |
| Hypertension                                        | 23 (43.4)              | 69 (31.9)        | 72 (43.4)              | 20 (25.3)         | 0.01           | 26 (22.6)          |
| Dyslipidaemia                                       | 6 (11.3)               | 31 (14.4)        | 25 (15.2)              | 12 (15.2)         | 1              | 16 (13.9)          |
| Diabetes mellitus                                   | 13 (24.5)              | 37 (17.1)        | 39 (23.5)              | 11 (13.9)         | 0.117          | 25 (21.7)          |
| COPD                                                | 2 (3.8)                | 12 (5.6)         | 10 (6.1)               | 4 (5.1)           | 0.985          | 9 (7.8)            |
| CAD                                                 | 5 (9.4)                | 16 (7.4)         | 13 (7.9)               | 8 (10.3)          | 0.71           | 15 (13.0)          |
| SBP (mmHg)                                          | 130.9±27.3             | 132.5±22.0       | 129.7±21.4             | 137.1±25.7        | 0.021          | 129.7±18.6         |
| BMI (kg/m <sup>2</sup> )                            | 30.0±9.6               | 27.7±6.3         | 28.5±6.1               | 27.2±9.4          | 0.298          | 30.6±7.6           |
| <b>Medication, n (%)</b>                            |                        |                  |                        |                   |                |                    |
| Statins                                             | 13 (24.5)              | 59 (27.3)        | 55 (33.1)              | 17 (21.5)         | 0.086          | 18 (15.7)          |
| ACEi                                                | 7 (13.2)               | 27 (12.5)        | 29 (17.5)              | 5 (6.3)           | 0.031          | 10 (8.7)           |
| Beta blockers                                       | 5 (9.4)                | 23 (10.6)        | 20 (12.0)              | 8 (10.1)          | 0.82           | 9 (7.8)            |
| <b>Biochemical measurements</b>                     |                        |                  |                        |                   |                |                    |
| CRP (mg/L)                                          | 82.9[33.0-180.0]       | 75.6[18.0-156.3] | 97.0 [37.5, 185.3]     | 16.70 [2.1, 86.5] | <0.001         | 98.8 [54.9, 141.4] |
| WBC (x10 <sup>3</sup> )                             | 8.3 [6.4-12.0]         | 8.6 [6.1-12.3]   | 7.5 [5.4, 10.7]        | 10.3 [7.5, 14.7]  | <0.001         | 7.1 [5.3, 9.5]     |
| Troponin (ng/L)                                     | 5.0 [2.0-62.5]         | 5.0 [2.0-20.0]   | 5.0 [2.0, 32.0]        | 3.0 [2.0, 11.0]   | 0.255          | 6.0 [4.0, 17.5]    |
| <b>COVID Severity</b>                               |                        |                  |                        |                   |                |                    |
| Mild                                                | -                      | -                | 34.3%                  | -                 | -              | 9.6%               |
| Moderate                                            | -                      | -                | 36.1%                  | -                 | -              | 49.6%              |
| Severe                                              | -                      | -                | 10.0%                  | -                 | -              | 25.2%              |
| Critical                                            | -                      | -                | 19.5%                  | -                 | -              | 15.6%              |
| <b>Scan parameters</b>                              |                        |                  |                        |                   |                |                    |
| Tube Voltage (kVp) or Effective Energy (keV), n (%) |                        |                  |                        |                   |                |                    |
| 100 kVp                                             | 35 (66.0)              | 142 (65.7)       | 114 (67.5)             | 63 (63.0)         | 0.45           | 98 (85.2)          |
| 110 kVp                                             | 0 (0)                  | 0 (0)            | 0                      | 0                 | -              | 13 (11.3)          |
| 120 kVp                                             | 8 (15.1)               | 27 (12.5)        | 1 (0.6)                | 34 (34.0)         | <0.001         | 4 (3.5)            |
| 55 keV                                              | 1 (1.9)                | 3 (1.4)          | 3 (1.8)                | 1 (1.0)           | 0.61           | 0 (0)              |
| 58 keV                                              | 9 (17.0)               | 40 (18.5)        | 48 (28.4)              | 1 (1.0)           | <0.001         | 0 (0)              |
| 70 keV                                              | 0 (0.0)                | 4 (1.9)          | 3 (1.8)                | 1 (1.0)           | 0.61           | 0 (0)              |
| <b>Outcomes</b>                                     |                        |                  |                        |                   |                |                    |
| Days in hospital                                    | 7.0[0.0-18.0]          | 4.0[0.0-13.0]    | 8.0 [3.0, 18.0]        | 0.0 [0.0, 4.0]    | <0.001         | 8.0 [5.0, 14.0]    |
| Death in-hospital, n(%)                             | 12 (22.6)              | 21 (9.7)         | 30 (17.8)              | 3 (3.3)           | 0.002          | 19 (16.5)          |
| Composite endpoint, n(%)                            | 19 (35.8)              | 59 (27.3)        | 70 (41.4)              | 8 (8.9)           | <0.001         | 30 (26.1)          |

COPD=Chronic Obstructive pulmonary disease; CAD: Coronary Artery Disease; SBP: Systolic blood pressure; ACEi=angiotensin converting enzyme inhibitors; BMI=Body Mass Index; WBC=White Blood Cells count; ICU=Intensive care unit; Composite endpoint includes death in-hospital and/or admission to intensive care unit; continuous variables reported as median [IQR]. Continuous variables are expressed as mean±SD or median[range] as appropriate. P values derived from comparisons between COVID and non-COVID patients of the first wave Study Arm 3 population.

**Online Table 6. Demographic characteristics of the Study Arm 4 population.**

|                                            | <b>Study Arm 4 population</b> |
|--------------------------------------------|-------------------------------|
| <b>Total (n)</b>                           | <b>104</b>                    |
| <b>Recruitment centre/region</b>           |                               |
| Leicester                                  | 56                            |
| Bath                                       | 48                            |
| <b>Age (years)</b>                         | 63.7 [54.0, 74.0]             |
| <b>Male sex, n (%)</b>                     | 63 (60.6)                     |
| <b>Risk factors, n (%)</b>                 |                               |
| Hypertension                               | 30 (28.8)                     |
| Dyslipidaemia                              | 13 (12.5)                     |
| Diabetes mellitus                          | 28 (26.9)                     |
| CAD                                        | 3 (2.9)                       |
| COPD                                       | 17 (16.3)                     |
| Systolic blood pressure (mmHg)             | 128.2 ± 22.4                  |
| Body Mass Index (kg/m <sup>2</sup> )       | 29.7 ± 5.8                    |
| <b>Biochemical measurements</b>            |                               |
| C-reactive protein (mg/L)                  | 62.5 [28.0, 148.5]            |
| Troponin                                   | 9.5 [6.0, 23.3]               |
| White blood cell count (x10 <sup>3</sup> ) | 9.4 [6.5, 12.0]               |
| Lymphocytes cell count (x10 <sup>3</sup> ) | 1.0 [0.7, 1.6]                |
| Monocytes cell count (x10 <sup>3</sup> )   | 0.5 [0.3, 0.8]                |
| <b>Tube Voltage (kVp)</b>                  |                               |
| 100 (kVp, n, %)                            | 55 (52.9)                     |
| 110 (kVp, n, %)                            | 3 (2.9)                       |
| 120 (kVp, n, %)                            | 39 (37.5)                     |
| 140 (kVp, n, %)                            | 7 (6.7)                       |
| <b>Severity</b>                            |                               |
| Mild                                       | 13.5%                         |
| Moderate                                   | 39.4%                         |
| Severe                                     | 27.9%                         |
| Critical                                   | 19.2%                         |

COPD=Chronic Obstructive pulmonary disease; CAD: Coronary Artery Disease; continuous variables reported as means+/-SD or median[range] as appropriate.

**Online Table 7. Conversion factors for different CT energies**

| <b>Conversion Factor for Adipose Tissue</b> |               |
|---------------------------------------------|---------------|
| 100 kVp (tube voltage)                      | 1 (reference) |
| 110 kVp (tube voltage)                      | 1.054740019   |
| 120 kVp (tube voltage)                      | 1.114849188   |
| 70keV (effective energy)                    | 0.988683128   |
| 58 keV (effective energy)                   | 0.817537672   |
| 55 keV (effective energy)                   | 0.771195642   |



**Online Table 8. Comparison of performance of different machine learning approached for the development of C19-RS.**

| <b>Model-Method</b>              | <b>AUC for COVID-19 status detection in Study Arm 3 (n=331)</b> |
|----------------------------------|-----------------------------------------------------------------|
| <b>Extreme Gradient Boosting</b> |                                                                 |
| gbtree                           | 0.65 [95%CI: 0.57-0.73], p<0.001                                |
| gblinear                         | 0.57 [95%CI: 0.50-0.64], p=0.056                                |
| dart                             | 0.62 [95%CI: 0.55-0.70], p<0.001                                |
| <b>Random Forest</b>             |                                                                 |
| rf                               | 0.62 [95%CI: 0.54-0.70], p<0.001                                |
| ranger                           | 0.58 [95%CI: 0.51-0.66], p=0.02                                 |
| <b>Neural Network</b>            |                                                                 |
| avNNet                           | 0.55 [95%CI: 0.47-0.62], p=0.18                                 |
| <b>Bayesian Model</b>            |                                                                 |
| bayesglm                         | 0.56 [95%CI: 0.49-0.63], p=0.09                                 |

**Online Table 9. Radiomic features comprising C19-RS**

| <b>AA</b> | <b>Radiomic Feature Name</b>                                     |
|-----------|------------------------------------------------------------------|
| F1        | wavelet.LHH_glcm_Imc2_aorta                                      |
| F2        | log.sigma.4.0.mm.3D_glszm_GrayLevelNonUniformityNormalized_ima   |
| F3        | wavelet.LHH_glcm_Correlation_aorta                               |
| F4        | wavelet.LLL_glcm_JointAverage_ima                                |
| F5        | log.sigma.1.0.mm.3D_ngtdm_Strength_aorta                         |
| F6        | wavelet.LLL_glcm_DifferenceVariance_aorta                        |
| F7        | log.sigma.2.0.mm.3D_glcm_Correlation_aorta                       |
| F8        | log.sigma.1.0.mm.3D_firstorder_Skewness_aorta                    |
| F9        | log.sigma.1.0.mm.3D_glszm_SizeZoneNonUniformity_aorta            |
| F10       | logarithm_glcm_Imc2_ima                                          |
| F11       | wavelet.LLL_glszm_GrayLevelNonUniformityNormalized_ima           |
| F12       | log.sigma.5.0.mm.3D_glrlm_RunLengthNonUniformityNormalized_aorta |
| F13       | wavelet.HLH_firstorder_Maximum_ima                               |
| F14       | log.sigma.5.0.mm.3D_glszm_SmallAreaHighGrayLevelEmphasis_aorta   |
| F15       | wavelet.LHL_firstorder_Median_aorta                              |
| F16       | log.sigma.3.0.mm.3D_firstorder_Maximum_ima                       |
| F17       | log.sigma.1.0.mm.3D_glcm_InverseVariance_ima                     |
| F18       | wavelet.LHL_firstorder_Range_aorta                               |
| F19       | log.sigma.4.0.mm.3D_firstorder_Median_aorta                      |
| F20       | wavelet.HHH_glcm_ClusterTendency_ima                             |
| F21       | wavelet.HLL_glcm_ClusterProminence_aorta                         |
| F22       | wavelet.HHH_glcm_MaximumProbability_aorta                        |
| F23       | wavelet.LLL_glrlm_RunEntropy_aorta                               |
| F24       | wavelet.HLL_ngtdm_Strength_aorta                                 |
| F25       | wavelet.HHL_firstorder_Maximum_aorta                             |

**Online Table 10. Proportion of Study Arm 3 patients with high C19-RS and outcomes with low troponin and CRP.**

|                           | Total number | Deaths in hospital | Composite endpoint | High C19-RS                          |
|---------------------------|--------------|--------------------|--------------------|--------------------------------------|
| <b>CRP&lt;50mg/L</b>      | 73           | 9 (12.3%)          | 14 (19.1%)         | 18 (24.6%)<br>5 deaths/6 composite   |
| <b>Troponin&lt;20ng/L</b> | 182          | 16 (8.7%)          | 48 (26.37%)        | 61 (33.5%)<br>11 deaths/23 composite |

CRP: C-Reactive Protein.

---

**Online Table 11. Sensitivity analysis excluding variables with high missingness**

---

|                                 | <b>Study Arm 3</b>                | <b>Study Arm 4</b>               |
|---------------------------------|-----------------------------------|----------------------------------|
| <b>Fully Adjusted HR*</b>       | 3.31 [95%CI: 1.49-7.33], p=0.003  | 2.58 [95%CI: 1.10-6.05], p=0.028 |
| <b>Sensitivity Analysis HR#</b> | 3.55 [95%CI: 1.73-7.29], p=0.0006 | 2.21 [95%CI: 1.04-4.71], p=0.04  |

---

Sensitivity analyses in Study Arm 3 and 4 populations are exploratory post-hoc analyses excluding variables with high degree of missingness (>10%) after data collection was completed.

\*adjusted for adjusted for age above 65, sex, hypertension, hyperlipidaemia, diabetes, BMI, presence of coronary artery disease, C-reactive protein plasma levels, white blood cell count, plasma troponin, history of chronic obstructive pulmonary disease and CT tube voltage

#adjusted only for variables with missingness below 10%: age above 65, sex, hypertension, hyperlipidaemia, diabetes, presence of coronary artery disease, white blood cell count, history of chronic obstructive pulmonary disease and CT tube voltage

---

**Online Table 12. Genes in the Green Module**

| <b>ENSEMBL ID</b>      | <b>ENTREZ ID</b> |
|------------------------|------------------|
| <b>ENSG00000148498</b> | PARD3            |
| <b>ENSG00000088726</b> | TMEM40           |
| <b>ENSG00000047648</b> | ARHGAP6          |
| <b>ENSG00000101162</b> | TUBB1            |
| <b>ENSG00000005249</b> | PRKAR2B          |
| <b>ENSG00000085733</b> | CTTN             |
| <b>ENSG00000127533</b> | F2RL3            |
| <b>ENSG00000061918</b> | GUCY1B1          |
| <b>ENSG00000151693</b> | ASAP2            |
| <b>ENSG00000107863</b> | ARHGAP21         |
| <b>ENSG00000065534</b> | MYLK             |
| <b>ENSG00000177119</b> | ANO6             |
| <b>ENSG00000154146</b> | NRGN             |
| <b>ENSG00000123739</b> | PLA2G12A         |
| <b>ENSG00000138798</b> | EGF              |
| <b>ENSG00000144677</b> | CTDSPL           |
| <b>ENSG00000173210</b> | ABLIM3           |
| <b>ENSG00000140022</b> | STON2            |
| <b>ENSG00000011105</b> | TSPAN9           |
| <b>ENSG00000204424</b> | LY6G6F           |
| <b>ENSG00000102230</b> | PCYT1B           |
| <b>ENSG00000138735</b> | PDE5A            |
| <b>ENSG00000171611</b> | PTCRA            |
| <b>ENSG00000088053</b> | GP6              |
| <b>ENSG00000013016</b> | EHD3             |
| <b>ENSG00000107438</b> | PDLIM1           |
| <b>ENSG00000101856</b> | PGRMC1           |
| <b>ENSG00000178033</b> | CALHM5           |
| <b>ENSG00000197461</b> | PDGFA            |
| <b>ENSG00000158457</b> | TSPAN33          |
| <b>ENSG00000049323</b> | LTBP1            |
| <b>ENSG00000168497</b> | CAVIN2           |
| <b>ENSG00000090975</b> | PITPNM2          |
| <b>ENSG00000095303</b> | PTGS1            |
| <b>ENSG00000187800</b> | PEAR1            |
| <b>ENSG00000102362</b> | SYTL4            |

|                        |            |
|------------------------|------------|
| <b>ENSG00000164116</b> | GUCY1A1    |
| <b>ENSG00000169756</b> | LIMS1      |
| <b>ENSG00000108839</b> | ALOX12     |
| <b>ENSG00000180354</b> | MTURN      |
| <b>ENSG00000072422</b> | RHOBTB1    |
| <b>ENSG00000166091</b> | CMTM5      |
| <b>ENSG00000183785</b> | TUBA8      |
| <b>ENSG00000225528</b> | Z82206.1   |
| <b>ENSG00000204420</b> | MPIG6B     |
| <b>ENSG00000128266</b> | GNAZ       |
| <b>ENSG00000160789</b> | LMNA       |
| <b>ENSG00000185245</b> | GP1BA      |
| <b>ENSG00000113140</b> | SPARC      |
| <b>ENSG00000205038</b> | PKHD1L1    |
| <b>ENSG00000198478</b> | SH3BGRL2   |
| <b>ENSG00000174175</b> | SELP       |
| <b>ENSG00000149218</b> | ENDOD1     |
| <b>ENSG00000081377</b> | CDC14B     |
| <b>ENSG00000149564</b> | ESAM       |
| <b>ENSG00000165914</b> | TTC7B      |
| <b>ENSG00000165702</b> | GFI1B      |
| <b>ENSG00000164181</b> | ELOVL7     |
| <b>ENSG00000111644</b> | ACRBP      |
| <b>ENSG00000152952</b> | PLOD2      |
| <b>ENSG00000035403</b> | VCL        |
| <b>ENSG00000169247</b> | SH3TC2     |
| <b>ENSG00000267279</b> | AC090409.1 |
| <b>ENSG00000061676</b> | NCKAP1     |
| <b>ENSG00000169704</b> | GP9        |
| <b>ENSG00000099256</b> | PRTFDC1    |
| <b>ENSG00000179855</b> | GIPC3      |
| <b>ENSG00000006638</b> | TBXA2R     |
| <b>ENSG00000166681</b> | BEX3       |
| <b>ENSG00000188191</b> | PRKAR1B    |
| <b>ENSG00000143363</b> | PRUNE1     |
| <b>ENSG00000146376</b> | ARHGAP18   |
| <b>ENSG00000185532</b> | PRKG1      |
| <b>ENSG00000197959</b> | DNM3       |
| <b>ENSG00000165646</b> | SLC18A2    |
| <b>ENSG00000259207</b> | ITGB3      |

|                        |            |
|------------------------|------------|
| <b>ENSG00000180190</b> | TDRP       |
| <b>ENSG00000185340</b> | GAS2L1     |
| <b>ENSG00000163898</b> | LIPH       |
| <b>ENSG00000187699</b> | C2orf88    |
| <b>ENSG00000269556</b> | TMEM185A   |
| <b>ENSG00000172572</b> | PDE3A      |
| <b>ENSG00000128245</b> | YWHAH      |
| <b>ENSG00000122786</b> | CALD1      |
| <b>ENSG00000204310</b> | AGPAT1     |
| <b>ENSG00000109265</b> | CRACD      |
| <b>ENSG00000100351</b> | GRAP2      |
| <b>ENSG00000108960</b> | MMD        |
| <b>ENSG00000259330</b> | INAFM2     |
| <b>ENSG00000108576</b> | SLC6A4     |
| <b>ENSG00000161911</b> | TREML1     |
| <b>ENSG00000182732</b> | RGS6       |
| <b>ENSG00000160014</b> | CALM3      |
| <b>ENSG00000124491</b> | F13A1      |
| <b>ENSG00000212864</b> | RNF208     |
| <b>ENSG00000100678</b> | SLC8A3     |
| <b>ENSG00000177076</b> | ACER2      |
| <b>ENSG00000074416</b> | MGLL       |
| <b>ENSG00000069966</b> | GNB5       |
| <b>ENSG00000246889</b> | AP000487.1 |
| <b>ENSG00000163737</b> | PF4        |
| <b>ENSG00000127920</b> | GNG11      |
| <b>ENSG00000166963</b> | MAP1A      |
| <b>ENSG00000254703</b> | SENCR      |
| <b>ENSG00000106665</b> | CLIP2      |
| <b>ENSG00000150630</b> | VEGFC      |
| <b>ENSG00000119280</b> | C1orf198   |
| <b>ENSG00000108846</b> | ABCC3      |
| <b>ENSG00000260244</b> | AC104083.1 |
| <b>ENSG00000259719</b> | LINC02284  |
| <b>ENSG00000147036</b> | LANCL3     |
| <b>ENSG00000103184</b> | SEC14L5    |
| <b>ENSG00000137672</b> | TRPC6      |
| <b>ENSG00000138722</b> | MMRN1      |
| <b>ENSG00000104341</b> | LAPTM4B    |
| <b>ENSG00000169398</b> | PTK2       |

|                        |            |
|------------------------|------------|
| <b>ENSG00000137941</b> | TLL7       |
| <b>ENSG00000279970</b> | AC023024.2 |
| <b>ENSG00000111328</b> | CDK2AP1    |
| <b>ENSG00000003436</b> | TFPI       |
| <b>ENSG00000128578</b> | STRIP2     |
| <b>ENSG00000176783</b> | RUFY1      |
| <b>ENSG00000248516</b> | AC105415.1 |
| <b>ENSG00000197415</b> | VEPH1      |
| <b>ENSG00000120885</b> | CLU        |
| <b>ENSG00000082781</b> | ITGB5      |
| <b>ENSG00000110013</b> | SIAE       |
| <b>ENSG00000140374</b> | ETFA       |
| <b>ENSG00000102178</b> | UBL4A      |
| <b>ENSG00000187098</b> | MITF       |
| <b>ENSG00000133627</b> | ACTR3B     |
| <b>ENSG00000140479</b> | PCSK6      |
| <b>ENSG00000127831</b> | VIL1       |
| <b>ENSG00000250091</b> | DNAH10OS   |
| <b>ENSG00000148426</b> | PROSER2    |
| <b>ENSG00000088826</b> | SMOX       |
| <b>ENSG00000162367</b> | TAL1       |
| <b>ENSG00000255240</b> | AP001636.3 |
| <b>ENSG00000150594</b> | ADRA2A     |
| <b>ENSG00000069535</b> | MAOB       |
| <b>ENSG00000081181</b> | ARG2       |
| <b>ENSG00000205309</b> | NT5M       |
| <b>ENSG00000133401</b> | PDZD2      |
| <b>ENSG00000188677</b> | PARVB      |
| <b>ENSG00000106976</b> | DNM1       |
| <b>ENSG00000198873</b> | GRK5       |
| <b>ENSG00000101082</b> | SLA2       |
| <b>ENSG00000103942</b> | HOMER2     |
| <b>ENSG00000047617</b> | ANO2       |
| <b>ENSG00000160013</b> | PTGIR      |
| <b>ENSG00000225936</b> | AL731557.1 |
| <b>ENSG00000140682</b> | TGFB1I1    |
| <b>ENSG00000005961</b> | ITGA2B     |
| <b>ENSG00000178057</b> | NDUFAF3    |
| <b>ENSG00000256235</b> | SMIM3      |
| <b>ENSG00000101335</b> | MYL9       |



|                        |            |
|------------------------|------------|
| <b>ENSG00000259869</b> | AL022344.1 |
| <b>ENSG00000137942</b> | FNBP1L     |
| <b>ENSG00000128791</b> | TWSG1      |
| <b>ENSG00000227811</b> | INKA2-AS1  |
| <b>ENSG00000163430</b> | FSTL1      |
| <b>ENSG00000176903</b> | PNMA1      |
| <b>ENSG00000102804</b> | TSC22D1    |
| <b>ENSG00000138685</b> | FGF2       |
| <b>ENSG00000269970</b> | AL162424.1 |
| <b>ENSG00000022267</b> | FHL1       |
| <b>ENSG00000153162</b> | BMP6       |
| <b>ENSG00000167553</b> | TUBA1C     |
| <b>ENSG00000167645</b> | YIF1B      |
| <b>ENSG00000124762</b> | CDKN1A     |
| <b>ENSG00000235257</b> | ITGA9-AS1  |
| <b>ENSG00000264964</b> | AP001033.3 |
| <b>ENSG00000254614</b> | AP003068.2 |
| <b>ENSG00000234810</b> | AL603840.1 |
| <b>ENSG00000253520</b> | AC136628.3 |
| <b>ENSG00000153071</b> | DAB2       |
| <b>ENSG00000203485</b> | INF2       |
| <b>ENSG00000188549</b> | CCDC9B     |
| <b>ENSG00000110880</b> | CORO1C     |
| <b>ENSG00000117155</b> | SSX2IP     |
| <b>ENSG00000231131</b> | LNCAROD    |
| <b>ENSG00000095321</b> | CRAT       |
| <b>ENSG00000198948</b> | MFAP3L     |
| <b>ENSG00000050393</b> | MCUR1      |
| <b>ENSG00000249898</b> | MCPH1-AS1  |
| <b>ENSG00000198513</b> | ATL1       |
| <b>ENSG00000166086</b> | JAM3       |
| <b>ENSG00000167641</b> | PPP1R14A   |
| <b>ENSG00000119862</b> | LGALSL     |
| <b>ENSG00000188013</b> | MEIS3P2    |
| <b>ENSG00000106366</b> | SERPINE1   |
| <b>ENSG00000178732</b> | GP5        |
| <b>ENSG00000004866</b> | ST7        |
| <b>ENSG00000132970</b> | WASF3      |
| <b>ENSG00000147650</b> | LRP12      |
| <b>ENSG00000182253</b> | SYNM       |

|                        |            |
|------------------------|------------|
| <b>ENSG00000100439</b> | ABHD4      |
| <b>ENSG00000276141</b> | WHAMMP3    |
| <b>ENSG00000109572</b> | CLCN3      |
| <b>ENSG00000165682</b> | CLEC1B     |
| <b>ENSG00000254877</b> | AP001636.2 |
| <b>ENSG00000150637</b> | CD226      |
| <b>ENSG00000071051</b> | NCK2       |
| <b>ENSG00000041353</b> | RAB27B     |
| <b>ENSG00000253819</b> | LINC01151  |
| <b>ENSG00000174456</b> | C12orf76   |
| <b>ENSG00000134548</b> | SPX        |
| <b>ENSG00000143369</b> | ECM1       |
| <b>ENSG00000156011</b> | PSD3       |
| <b>ENSG00000143595</b> | AQP10      |
| <b>ENSG00000129521</b> | EGLN3      |
| <b>ENSG00000261253</b> | AC137932.2 |
| <b>ENSG00000260912</b> | AL158206.1 |
| <b>ENSG00000197879</b> | MYO1C      |
| <b>ENSG00000146858</b> | ZC3HAV1L   |
| <b>ENSG00000198586</b> | TLK1       |
| <b>ENSG00000185614</b> | INKA1      |
| <b>ENSG00000198753</b> | PLXNB3     |
| <b>ENSG00000140416</b> | TPM1       |
| <b>ENSG00000142192</b> | APP        |
| <b>ENSG00000141198</b> | TOM1L1     |
| <b>ENSG00000127838</b> | PNKD       |
| <b>ENSG00000169083</b> | AR         |
| <b>ENSG00000173542</b> | MOB1B      |
| <b>ENSG00000253394</b> | LINC00534  |
| <b>ENSG00000231652</b> | AL590428.1 |
| <b>ENSG00000197122</b> | SRC        |
| <b>ENSG00000117400</b> | MPL        |
| <b>ENSG00000154917</b> | RAB6B      |
| <b>ENSG00000205126</b> | ACCSL      |
| <b>ENSG00000184602</b> | SNN        |
| <b>ENSG00000097021</b> | ACOT7      |
| <b>ENSG00000214018</b> | RRM2P3     |
| <b>ENSG00000169047</b> | IRS1       |
| <b>ENSG00000184500</b> | PROS1      |
| <b>ENSG00000172794</b> | RAB37      |

|                        |             |
|------------------------|-------------|
| <b>ENSG00000223855</b> | AC147651.1  |
| <b>ENSG00000112078</b> | KCTD20      |
| <b>ENSG00000235609</b> | AF127577.4  |
| <b>ENSG00000141873</b> | SLC39A3     |
| <b>ENSG00000185052</b> | SLC24A3     |
| <b>ENSG00000024422</b> | EHD2        |
| <b>ENSG00000158560</b> | DYNC1I1     |
| <b>ENSG00000233276</b> | GPX1        |
| <b>ENSG00000079482</b> | OPHN1       |
| <b>ENSG00000183914</b> | DNAH2       |
| <b>ENSG00000172889</b> | EGFL7       |
| <b>ENSG00000260792</b> | LINC02280   |
| <b>ENSG00000171159</b> | C9orf16     |
| <b>ENSG00000068796</b> | KIF2A       |
| <b>ENSG00000109089</b> | CDR2L       |
| <b>ENSG00000084693</b> | AGBL5       |
| <b>ENSG00000283633</b> | AP000547.3  |
| <b>ENSG00000248636</b> | AC002070.1  |
| <b>ENSG00000175854</b> | SWI5        |
| <b>ENSG00000133317</b> | LGALS12     |
| <b>ENSG00000185015</b> | CA13        |
| <b>ENSG00000105971</b> | CAV2        |
| <b>ENSG00000185222</b> | TCEAL9      |
| <b>ENSG00000156535</b> | CD109       |
| <b>ENSG00000103876</b> | FAH         |
| <b>ENSG00000126903</b> | SLC10A3     |
| <b>ENSG00000179399</b> | GPC5        |
| <b>ENSG00000213977</b> | TAX1BP3     |
| <b>ENSG00000176490</b> | DIRAS1      |
| <b>ENSG00000139835</b> | GRTP1       |
| <b>ENSG00000101412</b> | E2F1        |
| <b>ENSG00000235513</b> | L3MBTL2-AS1 |
| <b>ENSG00000167363</b> | FN3K        |
| <b>ENSG00000272468</b> | AL021807.1  |
| <b>ENSG00000072657</b> | TRHDE       |
| <b>ENSG00000267060</b> | PTGES3L     |
| <b>ENSG00000186889</b> | TMEM17      |
| <b>ENSG00000134909</b> | ARHGAP32    |
| <b>ENSG00000170935</b> | NCBP2L      |
| <b>ENSG00000255478</b> | AP000944.1  |

|                         |            |
|-------------------------|------------|
| <b>ENSG00000125257</b>  | ABCC4      |
| <b>ENSG00000112290</b>  | WASF1      |
| <b>ENSG00000167460</b>  | TPM4       |
| <b>ENSG00000169241</b>  | SLC50A1    |
| <b>ENSG00000198829</b>  | SUCNR1     |
| <b>ENSG00000173852</b>  | DPY19L1    |
| <b>ENSG00000255045</b>  | AP000866.5 |
| <b>ENSG00000225981</b>  | AC102953.1 |
| <b>ENSG00000213672</b>  | NCKIPSD    |
| <b>ENSG00000148484</b>  | RSU1       |
| <b>ENSG00000131711</b>  | MAP1B      |
| <b>ENSG00000127325</b>  | BEST3      |
| <b>ENSG00000188580</b>  | NKAIN2     |
| <b>ENSG00000273123</b>  | AC020634.2 |
| <b>ENSG00000224805</b>  | LINC00853  |
| <b>ENSG00000112977</b>  | DAP        |
| <b>ENSG00000143195</b>  | ILDR2      |
| <b>ENSG00000135919</b>  | SERPINE2   |
| <b>ENSG00000115290</b>  | GRB14      |
| <b>ENSG00000108039</b>  | XPNPEP1    |
| <b>ENSG00000250334</b>  | LINC00989  |
| <b>ENSG00000162687</b>  | KCNT2      |
| <b>ENSG00000172159</b>  | FRMD3      |
| <b>ENSG00000147394</b>  | ZNF185     |
| <b>ENSG00000006831</b>  | ADIPOR2    |
| <b>ENSG00000143418</b>  | CERS2      |
| <b>ENSG00000101333</b>  | PLCB4      |
| <b>ENSG00000173626</b>  | TRAPPC3L   |
| <b>ENSG00000163736</b>  | PPBP       |
| <b>ENSG00000103740</b>  | ACSBG1     |
| <b>ENSG00000169946</b>  | ZFPM2      |
| <b>ENSG00000134668</b>  | SPOCD1     |
| <b>ENSG00000120279</b>  | MYCT1      |
| <b>ENSG00000284693</b>  | LINC02606  |
| <b>ENSG00000282863</b>  | AC012560.2 |
| <b>ENSG00000162852</b>  | CNST       |
| <b>ENSG00000017260</b>  | ATP2C1     |
| <b>ENSG00000228474</b>  | OST4       |
| <b>ENSG000000087460</b> | GNAS       |
| <b>ENSG00000244041</b>  | LINC01011  |

|                        |                   |
|------------------------|-------------------|
| <b>ENSG00000153714</b> | LURAP1L           |
| <b>ENSG00000138080</b> | EMILIN1           |
| <b>ENSG00000144893</b> | MED12L            |
| <b>ENSG00000214357</b> | NEURL1B           |
| <b>ENSG00000156206</b> | CFAP161           |
| <b>ENSG00000072042</b> | RDH11             |
| <b>ENSG00000235927</b> | NEXN-AS1          |
| <b>ENSG00000103316</b> | CRYM              |
| <b>ENSG00000253227</b> | AC090192.2        |
| <b>ENSG00000183671</b> | GPR1              |
| <b>ENSG00000169860</b> | P2RY1             |
| <b>ENSG00000115170</b> | ACVR1             |
| <b>ENSG00000165716</b> | DIPK1B            |
| <b>ENSG00000174099</b> | MSRB3             |
| <b>ENSG00000113361</b> | CDH6              |
| <b>ENSG00000255874</b> | LINC00346         |
| <b>ENSG00000167468</b> | GPX4              |
| <b>ENSG00000130958</b> | SLC35D2           |
| <b>ENSG00000109066</b> | TMEM104           |
| <b>ENSG00000265148</b> | TSPOAP1-AS1       |
| <b>ENSG00000273117</b> | AC144652.1        |
| <b>ENSG00000180914</b> | OXTR              |
| <b>ENSG00000126803</b> | HSPA2             |
| <b>ENSG00000143995</b> | MEIS1             |
| <b>ENSG00000146416</b> | AIG1              |
| <b>ENSG00000100994</b> | PYGB              |
| <b>ENSG00000127252</b> | PLAAT1            |
| <b>ENSG00000169313</b> | P2RY12            |
| <b>ENSG00000287815</b> | AC005081.1        |
| <b>ENSG00000127526</b> | SLC35E1           |
| <b>ENSG00000181104</b> | F2R               |
| <b>ENSG00000226510</b> | UPK1A-AS1         |
| <b>ENSG00000182048</b> | TRPC2             |
| <b>ENSG00000115641</b> | FHL2              |
| <b>ENSG00000157837</b> | SPPL3             |
| <b>ENSG00000054356</b> | PTPRN             |
| <b>ENSG00000237118</b> | CYP2F2P           |
| <b>ENSG00000240497</b> | AC092919.2        |
| <b>ENSG00000250641</b> | LY6G6F-<br>LY6G6D |

|                        |            |
|------------------------|------------|
| <b>ENSG00000167100</b> | SAMD14     |
| <b>ENSG00000196924</b> | FLNA       |
| <b>ENSG00000254786</b> | AP001636.1 |
| <b>ENSG00000183963</b> | SMTN       |
| <b>ENSG00000180573</b> | H2AC6      |
| <b>ENSG00000249992</b> | TMEM158    |
| <b>ENSG00000206052</b> | DOK6       |
| <b>ENSG00000180694</b> | TMEM64     |
| <b>ENSG00000282828</b> | AC009971.1 |
| <b>ENSG00000236279</b> | CLEC2L     |
| <b>ENSG00000161013</b> | MGAT4B     |
| <b>ENSG00000246705</b> | H2AJ       |
| <b>ENSG00000136231</b> | IGF2BP3    |
| <b>ENSG00000196611</b> | MMP1       |
| <b>ENSG00000283632</b> | EXOC3L2    |
| <b>ENSG00000095739</b> | BAMBI      |
| <b>ENSG00000163590</b> | PPM1L      |
| <b>ENSG00000113083</b> | LOX        |
| <b>ENSG00000198752</b> | CDC42BPB   |
| <b>ENSG00000140830</b> | TXNL4B     |
| <b>ENSG00000183454</b> | GRIN2A     |
| <b>ENSG00000224116</b> | INHBA-AS1  |
| <b>ENSG00000142949</b> | PTPRF      |
| <b>ENSG00000245008</b> | AP001122.1 |
| <b>ENSG00000172992</b> | DCAKD      |
| <b>ENSG00000182747</b> | SLC35D3    |
| <b>ENSG00000124302</b> | CHST8      |
| <b>ENSG00000164171</b> | ITGA2      |
| <b>ENSG00000285043</b> | AC093512.2 |
| <b>ENSG00000287860</b> | AC079804.3 |
| <b>ENSG00000254933</b> | AP000785.1 |
| <b>ENSG00000010278</b> | CD9        |
| <b>ENSG00000110799</b> | VWF        |
| <b>ENSG00000169129</b> | AFAP1L2    |
| <b>ENSG00000129354</b> | AP1M2      |
| <b>ENSG00000159461</b> | AMFR       |
| <b>ENSG00000129473</b> | BCL2L2     |
| <b>ENSG00000064601</b> | CTSA       |
| <b>ENSG00000166333</b> | ILK        |
| <b>ENSG00000204872</b> | NAT8B      |

|                        |            |
|------------------------|------------|
| <b>ENSG00000255200</b> | PGAM1P8    |
| <b>ENSG00000151748</b> | SAV1       |
| <b>ENSG00000123191</b> | ATP7B      |
| <b>ENSG00000134297</b> | PLEKHA8P1  |
| <b>ENSG00000137225</b> | CAPN11     |
| <b>ENSG00000168135</b> | KCNJ4      |
| <b>ENSG00000184113</b> | CLDN5      |
| <b>ENSG00000247735</b> | AC120114.1 |
| <b>ENSG00000132613</b> | MTSS2      |
| <b>ENSG00000099785</b> | MARCHF2    |
| <b>ENSG00000125952</b> | MAX        |
| <b>ENSG00000104067</b> | TJP1       |
| <b>ENSG00000197147</b> | LRRC8B     |
| <b>ENSG00000163833</b> | FBXO40     |
| <b>ENSG00000100592</b> | DAAM1      |
| <b>ENSG00000177697</b> | CD151      |
| <b>ENSG00000176170</b> | SPHK1      |
| <b>ENSG00000075945</b> | KIFAP3     |
| <b>ENSG00000126856</b> | PRDM7      |
| <b>ENSG00000243709</b> | LEFTY1     |
| <b>ENSG00000117640</b> | MTFR1L     |
| <b>ENSG00000162430</b> | SELENON    |
| <b>ENSG00000255364</b> | SMILR      |
| <b>ENSG00000185305</b> | ARL15      |
| <b>ENSG00000128272</b> | ATF4       |
| <b>ENSG00000165757</b> | JCAD       |
| <b>ENSG00000023697</b> | DERA       |
| <b>ENSG00000103769</b> | RAB11A     |
| <b>ENSG00000137801</b> | THBS1      |
| <b>ENSG00000162614</b> | NEXN       |
| <b>ENSG00000078018</b> | MAP2       |
| <b>ENSG00000279138</b> | AP002847.1 |
| <b>ENSG00000184678</b> | H2BC21     |
| <b>ENSG00000120903</b> | CHRNA2     |
| <b>ENSG00000125388</b> | GRK4       |
| <b>ENSG00000287514</b> | AL450267.2 |
| <b>ENSG00000149932</b> | TMEM219    |
| <b>ENSG00000229754</b> | CXCR2P1    |
| <b>ENSG00000227550</b> | TRBV7-5    |
| <b>ENSG00000170425</b> | ADORA2B    |

|                        |            |
|------------------------|------------|
| <b>ENSG00000260032</b> | NORAD      |
| <b>ENSG00000255325</b> | AC108136.1 |
| <b>ENSG00000237529</b> | AL137847.2 |
| <b>ENSG00000106484</b> | MEST       |
| <b>ENSG00000168734</b> | PKIG       |
| <b>ENSG00000165091</b> | TMC1       |
| <b>ENSG00000230749</b> | MEIS1-AS2  |
| <b>ENSG00000108187</b> | PBLD       |
| <b>ENSG00000270689</b> | BUD13P1    |
| <b>ENSG00000253355</b> | AP003469.1 |
| <b>ENSG00000166035</b> | LIPC       |
| <b>ENSG00000100003</b> | SEC14L2    |
| <b>ENSG00000204323</b> | SMIM5      |
| <b>ENSG00000064961</b> | HMG20B     |
| <b>ENSG00000229619</b> | MBNL1-AS1  |
| <b>ENSG00000169224</b> | GCSAML     |
| <b>ENSG00000272701</b> | MESTIT1    |
| <b>ENSG00000279673</b> | AC092919.3 |
| <b>ENSG00000170421</b> | KRT8       |
| <b>ENSG00000116962</b> | NID1       |
| <b>ENSG00000088280</b> | ASAP3      |
| <b>ENSG00000050628</b> | PTGER3     |
| <b>ENSG00000169504</b> | CLIC4      |
| <b>ENSG00000066185</b> | ZMYND12    |
| <b>ENSG00000166311</b> | SMPD1      |
| <b>ENSG00000232725</b> | U52111.1   |
| <b>ENSG00000204614</b> | TRIM40     |
| <b>ENSG00000079156</b> | OSBPL6     |
| <b>ENSG00000244300</b> | GATA2-AS1  |
| <b>ENSG00000245281</b> | AC124242.1 |
| <b>ENSG00000160188</b> | RSPH1      |
| <b>ENSG00000042062</b> | RIPOR3     |
| <b>ENSG00000185909</b> | KLHDC8B    |
| <b>ENSG00000213625</b> | LEPROT     |
| <b>ENSG00000177324</b> | BEND2      |
| <b>ENSG00000250348</b> | AC113404.1 |
| <b>ENSG00000130176</b> | CNN1       |
| <b>ENSG00000186792</b> | HYAL3      |
| <b>ENSG00000102572</b> | STK24      |
| <b>ENSG00000254506</b> | AP003080.1 |



|                        |            |
|------------------------|------------|
| <b>ENSG00000255002</b> | LINC02324  |
| <b>ENSG00000106868</b> | SUSD1      |
| <b>ENSG00000127314</b> | RAP1B      |
| <b>ENSG00000128311</b> | TST        |
| <b>ENSG00000073464</b> | CLCN4      |
| <b>ENSG00000239405</b> | TMED10P2   |
| <b>ENSG00000125967</b> | NECAB3     |
| <b>ENSG00000163734</b> | CXCL3      |
| <b>ENSG00000253737</b> | AP003469.3 |
| <b>ENSG00000168067</b> | MAP4K2     |
| <b>ENSG00000113638</b> | TTC33      |
| <b>ENSG00000236411</b> | NDUFAF4P3  |
| <b>ENSG00000184838</b> | PRR16      |
| <b>ENSG00000229666</b> | MAST4-AS1  |
| <b>ENSG00000123500</b> | COL10A1    |
| <b>ENSG00000203395</b> | AC015969.1 |
| <b>ENSG00000273355</b> | AP000894.4 |
| <b>ENSG00000151789</b> | ZNF385D    |
| <b>ENSG00000105507</b> | CABP5      |
| <b>ENSG00000117586</b> | TNFSF4     |
| <b>ENSG00000040531</b> | CTNS       |
| <b>ENSG00000257267</b> | ZNF271P    |
| <b>ENSG00000274139</b> | AC090164.2 |
| <b>ENSG00000122778</b> | KIAA1549   |
| <b>ENSG00000254718</b> | AL157756.1 |
| <b>ENSG00000011258</b> | MBTD1      |
| <b>ENSG00000285909</b> | AP002762.2 |
| <b>ENSG00000088836</b> | SLC4A11    |
| <b>ENSG00000134030</b> | CTIF       |
| <b>ENSG00000210151</b> | MT-TS1     |
| <b>ENSG00000152128</b> | TMEM163    |
| <b>ENSG00000248334</b> | WHAMMP2    |
| <b>ENSG00000254810</b> | AP001189.3 |
| <b>ENSG00000147862</b> | NFIB       |
| <b>ENSG00000129636</b> | ITFG1      |
| <b>ENSG00000284391</b> | AL139398.1 |
| <b>ENSG00000222032</b> | AC112721.2 |
| <b>ENSG00000174233</b> | ADCY6      |
| <b>ENSG00000004776</b> | HSPB6      |
| <b>ENSG00000163738</b> | MTHFD2L    |

|                        |             |
|------------------------|-------------|
| <b>ENSG00000105499</b> | PLA2G4C     |
| <b>ENSG00000039987</b> | BEST2       |
| <b>ENSG00000143811</b> | PYCR2       |
| <b>ENSG00000174640</b> | SLCO2A1     |
| <b>ENSG00000233427</b> | AL009181.2  |
| <b>ENSG00000259120</b> | SMIM6       |
| <b>ENSG00000122970</b> | IFT81       |
| <b>ENSG00000144868</b> | TMEM108     |
| <b>ENSG00000169925</b> | BRD3        |
| <b>ENSG00000271743</b> | AF287957.1  |
| <b>ENSG00000124145</b> | SDC4        |
| <b>ENSG00000163359</b> | COL6A3      |
| <b>ENSG00000230385</b> | AC012507.1  |
| <b>ENSG00000167414</b> | GNG8        |
| <b>ENSG00000058866</b> | DGKG        |
| <b>ENSG00000263155</b> | MYZAP       |
| <b>ENSG00000132535</b> | DLG4        |
| <b>ENSG00000198805</b> | PNP         |
| <b>ENSG00000186480</b> | INSIG1      |
| <b>ENSG00000092096</b> | SLC22A17    |
| <b>ENSG00000142694</b> | EVA1B       |
| <b>ENSG00000158164</b> | TMSB15A     |
| <b>ENSG00000102893</b> | PHKB        |
| <b>ENSG00000055813</b> | CCDC85A     |
| <b>ENSG00000134853</b> | PDGFRA      |
| <b>ENSG00000226191</b> | CLK3P2      |
| <b>ENSG00000270055</b> | AC127502.2  |
| <b>ENSG00000224846</b> | NQO2-AS1    |
| <b>ENSG00000260249</b> | AC007608.3  |
| <b>ENSG00000277639</b> | AC007906.2  |
| <b>ENSG00000198695</b> | MT-ND6      |
| <b>ENSG00000171385</b> | KCND3       |
| <b>ENSG00000102755</b> | FLT1        |
| <b>ENSG00000166340</b> | TPP1        |
| <b>ENSG00000239445</b> | ST3GAL6-AS1 |
| <b>ENSG00000270578</b> | AP000787.2  |
| <b>ENSG00000175093</b> | SPSB4       |
| <b>ENSG00000106211</b> | HSPB1       |
| <b>ENSG00000184785</b> | SMIM10      |
| <b>ENSG00000205795</b> | CYS1        |

|                        |            |
|------------------------|------------|
| <b>ENSG00000236671</b> | PRKG1-AS1  |
| <b>ENSG00000236304</b> | AP001189.1 |
| <b>ENSG00000137878</b> | GCOM1      |
| <b>ENSG00000237419</b> | AL954642.1 |
| <b>ENSG00000227199</b> | ST7-AS1    |
| <b>ENSG00000166831</b> | RBPMS2     |
| <b>ENSG00000256050</b> | AL583722.1 |
| <b>ENSG00000184489</b> | PTP4A3     |
| <b>ENSG00000255363</b> | LINC02757  |
| <b>ENSG00000102468</b> | HTR2A      |
| <b>ENSG00000183690</b> | EFHC2      |
| <b>ENSG00000079257</b> | LXN        |
| <b>ENSG00000187391</b> | MAGI2      |
| <b>ENSG00000205456</b> | TP53TG3D   |
| <b>ENSG00000171502</b> | COL24A1    |
| <b>ENSG00000153904</b> | DDAH1      |
| <b>ENSG00000101470</b> | TNNC2      |
| <b>ENSG00000254717</b> | GLYATL1P2  |
| <b>ENSG00000107186</b> | MPDZ       |
| <b>ENSG00000143324</b> | XPR1       |
| <b>ENSG00000154188</b> | ANGPT1     |
| <b>ENSG00000272523</b> | LINC01023  |
| <b>ENSG00000068615</b> | REEP1      |
| <b>ENSG00000231437</b> | LINC01750  |
| <b>ENSG00000213949</b> | ITGA1      |
| <b>ENSG00000134201</b> | GSTM5      |
| <b>ENSG00000233968</b> | AL157895.2 |
| <b>ENSG00000242516</b> | LINC00960  |
| <b>ENSG00000114805</b> | PLCH1      |
| <b>ENSG00000133454</b> | MYO18B     |
| <b>ENSG00000169908</b> | TM4SF1     |
| <b>ENSG00000254332</b> | AF201337.1 |
| <b>ENSG00000176732</b> | PFN4       |
| <b>ENSG00000131095</b> | GFAP       |
| <b>ENSG00000268320</b> | SCGB1C2    |
| <b>ENSG00000210107</b> | MT-TQ      |
| <b>ENSG00000177947</b> | ODF3       |
| <b>ENSG00000181458</b> | TMEM45A    |
| <b>ENSG00000078804</b> | TP53INP2   |
| <b>ENSG00000187010</b> | RHD        |

|                        |            |
|------------------------|------------|
| <b>ENSG00000136295</b> | TTYH3      |
| <b>ENSG00000188076</b> | SCGB1C1    |
| <b>ENSG00000113924</b> | HGD        |
| <b>ENSG00000223486</b> | AC092198.1 |
| <b>ENSG00000103257</b> | SLC7A5     |
| <b>ENSG00000134278</b> | SPIRE1     |
| <b>ENSG00000259278</b> | AC087878.1 |
| <b>ENSG00000284959</b> | AC007262.2 |
| <b>ENSG00000279220</b> | GPR1-AS    |
| <b>ENSG00000198075</b> | SULT1C4    |
| <b>ENSG00000114654</b> | EFCC1      |
| <b>ENSG00000207359</b> | RNU6-925P  |
| <b>ENSG00000174951</b> | FUT1       |
| <b>ENSG00000072135</b> | PTPN18     |
| <b>ENSG00000235488</b> | JARID2-AS1 |
| <b>ENSG00000228742</b> | LINC02577  |
| <b>ENSG00000147400</b> | CETN2      |
| <b>ENSG00000242611</b> | AC093627.6 |
| <b>ENSG00000181322</b> | NME9       |
| <b>ENSG00000100399</b> | CHADL      |
| <b>ENSG00000134824</b> | FADS2      |
| <b>ENSG00000177340</b> | AC024940.1 |
| <b>ENSG00000205436</b> | EXOC3L4    |
| <b>ENSG00000137507</b> | LRRC32     |
| <b>ENSG00000175161</b> | CADM2      |
| <b>ENSG00000212747</b> | RTL8B      |
| <b>ENSG00000126458</b> | RRAS       |
| <b>ENSG00000164066</b> | INTU       |
| <b>ENSG00000102780</b> | DGKH       |
| <b>ENSG00000265844</b> | AC100863.1 |
| <b>ENSG00000153721</b> | CNKSR3     |
| <b>ENSG00000261455</b> | LINC01003  |
| <b>ENSG00000124006</b> | OBSL1      |
| <b>ENSG00000270240</b> | AC015849.1 |
| <b>ENSG00000144283</b> | PKP4       |
| <b>ENSG00000151838</b> | CCDC175    |
| <b>ENSG00000227640</b> | SOX21-AS1  |
| <b>ENSG00000249242</b> | TMEM150C   |
| <b>ENSG00000255028</b> | AP003049.2 |
| <b>ENSG00000177096</b> | PHETA2     |

|                        |            |
|------------------------|------------|
| <b>ENSG00000206560</b> | ANKRD28    |
| <b>ENSG00000284633</b> | AL031590.1 |
| <b>ENSG00000188039</b> | NWD1       |
| <b>ENSG00000226824</b> | AC006001.2 |
| <b>ENSG00000117245</b> | KIF17      |
| <b>ENSG00000176697</b> | BDNF       |
| <b>ENSG00000250722</b> | SELENOP    |
| <b>ENSG00000088367</b> | EPB41L1    |
| <b>ENSG00000220201</b> | ZGLP1      |
| <b>ENSG00000143194</b> | MAEL       |
| <b>ENSG00000223935</b> | LGALSL-DT  |
| <b>ENSG00000149243</b> | KLHL35     |
| <b>ENSG00000268433</b> | MTDHP3     |
| <b>ENSG00000198964</b> | SGMS1      |
| <b>ENSG00000176014</b> | TUBB6      |
| <b>ENSG00000196549</b> | MME        |
| <b>ENSG00000236936</b> | AL031005.1 |
| <b>ENSG00000167693</b> | NXN        |
| <b>ENSG00000169291</b> | SHE        |
| <b>ENSG00000277229</b> | AC084781.1 |
| <b>ENSG00000107669</b> | ATE1       |
| <b>ENSG00000210127</b> | MT-TA      |
| <b>ENSG00000166848</b> | TERF2IP    |
| <b>ENSG00000100280</b> | AP1B1      |
| <b>ENSG00000210194</b> | MT-TE      |
| <b>ENSG00000089169</b> | RPH3A      |
| <b>ENSG00000258388</b> | PPT2-EGFL8 |
| <b>ENSG00000087245</b> | MMP2       |
| <b>ENSG00000220517</b> | ASS1P1     |
| <b>ENSG00000237473</b> | AC068759.1 |
| <b>ENSG00000165046</b> | LETM2      |
| <b>ENSG00000256092</b> | SBNO1-AS1  |
| <b>ENSG00000144331</b> | ZNF385B    |
| <b>ENSG00000134352</b> | IL6ST      |
| <b>ENSG00000254186</b> | AC113414.1 |
| <b>ENSG00000255126</b> | AP003064.1 |
| <b>ENSG00000268278</b> | AC123912.3 |
| <b>ENSG00000113761</b> | ZNF346     |
| <b>ENSG00000226800</b> | CACTIN-AS1 |
| <b>ENSG00000272168</b> | CASC15     |

|                        |            |
|------------------------|------------|
| <b>ENSG00000137857</b> | DUOX1      |
| <b>ENSG00000261033</b> | AC005730.2 |
| <b>ENSG00000210144</b> | MT-TY      |
| <b>ENSG00000210100</b> | MT-TI      |
| <b>ENSG00000168306</b> | ACOX2      |
| <b>ENSG00000287037</b> | AC097709.1 |
| <b>ENSG00000186716</b> | BCR        |
| <b>ENSG00000262873</b> | AC127496.5 |
| <b>ENSG00000118946</b> | PCDH17     |
| <b>ENSG00000125898</b> | FAM110A    |
| <b>ENSG00000166153</b> | DEPDC4     |
| <b>ENSG00000136315</b> | AL355922.1 |
| <b>ENSG00000169760</b> | NLGN1      |
| <b>ENSG00000100842</b> | EFS        |
| <b>ENSG00000109272</b> | PF4V1      |
| <b>ENSG00000167646</b> | DNAAF3     |
| <b>ENSG00000150510</b> | FAM124A    |
| <b>ENSG00000236242</b> | MYO16-AS1  |
| <b>ENSG00000241318</b> | WDR82P2    |
| <b>ENSG00000248275</b> | TRIM52-AS1 |
| <b>ENSG00000167644</b> | C19orf33   |
| <b>ENSG00000237854</b> | LINC00674  |
| <b>ENSG00000204710</b> | SPDYC      |
| <b>ENSG00000119042</b> | SATB2      |
| <b>ENSG00000197632</b> | SERPINB2   |
| <b>ENSG00000174697</b> | LEP        |
| <b>ENSG00000259781</b> | HMGB1P6    |
| <b>ENSG00000115507</b> | OTX1       |
| <b>ENSG00000099337</b> | KCNK6      |
| <b>ENSG00000224914</b> | LINC00863  |
| <b>ENSG00000272434</b> | AC137630.3 |
| <b>ENSG00000166165</b> | CKB        |
| <b>ENSG00000103160</b> | HSDL1      |
| <b>ENSG00000204740</b> | MALRD1     |
| <b>ENSG00000153707</b> | PTPRD      |
| <b>ENSG00000254659</b> | LINC02715  |
| <b>ENSG00000244459</b> | AC147067.1 |
| <b>ENSG00000196872</b> | KIAA1211L  |
| <b>ENSG00000175175</b> | PPM1E      |
| <b>ENSG00000235522</b> | AC010978.1 |

|                        |             |
|------------------------|-------------|
| <b>ENSG00000154914</b> | USP43       |
| <b>ENSG00000224786</b> | CETN4P      |
| <b>ENSG00000267064</b> | UXT-AS1     |
| <b>ENSG00000159307</b> | SCUBE1      |
| <b>ENSG00000243969</b> | AC073359.2  |
| <b>ENSG00000235531</b> | MSC-AS1     |
| <b>ENSG00000132329</b> | RAMP1       |
| <b>ENSG00000263823</b> | AC009831.1  |
| <b>ENSG00000106603</b> | COA1        |
| <b>ENSG00000235802</b> | HCFC1-AS1   |
| <b>ENSG00000223553</b> | SMPD4P1     |
| <b>ENSG00000259953</b> | AL138756.1  |
| <b>ENSG00000122420</b> | PTGFR       |
| <b>ENSG00000170955</b> | CAVIN3      |
| <b>ENSG00000278611</b> | ZNF426-DT   |
| <b>ENSG00000225778</b> | PROSER2-AS1 |
| <b>ENSG00000272555</b> | AC009974.1  |
| <b>ENSG00000130052</b> | STARD8      |
| <b>ENSG00000107984</b> | DKK1        |
| <b>ENSG00000152767</b> | FARP1       |
| <b>ENSG00000184304</b> | PRKD1       |
| <b>ENSG00000276566</b> | IGKV1D-13   |
| <b>ENSG00000130529</b> | TRPM4       |
| <b>ENSG00000198729</b> | PPP1R14C    |
| <b>ENSG00000138413</b> | IDH1        |
| <b>ENSG00000135929</b> | CYP27A1     |
| <b>ENSG00000245112</b> | SMARCA5-AS1 |
| <b>ENSG00000121005</b> | CRISPLD1    |
| <b>ENSG00000278763</b> | FAM27B      |
| <b>ENSG00000124406</b> | ATP8A1      |
| <b>ENSG00000261342</b> | AC006538.1  |
| <b>ENSG00000254400</b> | AC091564.2  |
| <b>ENSG00000065833</b> | ME1         |
| <b>ENSG00000049860</b> | HEXB        |
| <b>ENSG00000277112</b> | ANKRD20A21P |
| <b>ENSG00000158055</b> | GRHL3       |
| <b>ENSG00000246792</b> | AC106038.1  |
| <b>ENSG00000198553</b> | KCNRG       |
| <b>ENSG00000236528</b> | AL033528.3  |
| <b>ENSG00000232316</b> | LINC02518   |

|                        |            |
|------------------------|------------|
| <b>ENSG00000173175</b> | ADCY5      |
| <b>ENSG00000147647</b> | DPYS       |
| <b>ENSG00000250535</b> | STK19B     |
| <b>ENSG00000214142</b> | RPL7P60    |
| <b>ENSG00000283639</b> | MIR9500    |
| <b>ENSG00000143768</b> | LEFTY2     |
| <b>ENSG00000276509</b> | AC239799.1 |
| <b>ENSG00000144485</b> | HES6       |
| <b>ENSG00000170891</b> | CYTL1      |
| <b>ENSG00000272360</b> | AC116036.2 |
| <b>ENSG00000227258</b> | SMIM2-AS1  |
| <b>ENSG00000228570</b> | NUTM2E     |
| <b>ENSG00000153237</b> | CCDC148    |
| <b>ENSG00000100097</b> | LGALS1     |
| <b>ENSG00000231636</b> | AGBL5-AS1  |
| <b>ENSG00000152315</b> | KCNK13     |
| <b>ENSG00000272153</b> | AL365330.1 |
| <b>ENSG00000233270</b> | SNRPEP4    |
| <b>ENSG00000164879</b> | CA3        |
| <b>ENSG00000280064</b> | AC130304.1 |
| <b>ENSG00000259353</b> | AC090515.5 |
| <b>ENSG00000167767</b> | KRT80      |
| <b>ENSG00000154133</b> | ROBO4      |
| <b>ENSG00000008394</b> | MGST1      |
| <b>ENSG00000128602</b> | SMO        |
| <b>ENSG00000047662</b> | FAM184B    |
| <b>ENSG00000139044</b> | B4GALNT3   |
| <b>ENSG00000275597</b> | ANAPC1P5   |
| <b>ENSG00000171962</b> | DRC3       |
| <b>ENSG00000210176</b> | MT-TH      |
| <b>ENSG00000272696</b> | AL359091.3 |
| <b>ENSG00000186818</b> | LILRB4     |
| <b>ENSG00000166073</b> | GPR176     |
| <b>ENSG00000226251</b> | LINC02608  |
| <b>ENSG00000174950</b> | CD164L2    |
| <b>ENSG00000092850</b> | TEKT2      |
| <b>ENSG00000175509</b> | AL078621.2 |
| <b>ENSG00000211974</b> | IGHV2-70D  |
| <b>ENSG00000204001</b> | LCN8       |
| <b>ENSG00000100036</b> | SLC35E4    |



**ENSG00000115616 | SLC9A2**

**Online Table 13. GOBP pathway enrichment analysis for MEgreen module member genes.**

| module | geneset_id | description                                 | p.adj    | p.val    | odds.ratio | n_fg | n_bg | fg_freq | bg_freq | n_set |
|--------|------------|---------------------------------------------|----------|----------|------------|------|------|---------|---------|-------|
| green  | GO:0007596 | blood coagulation                           | 7.74E-19 | 8.06E-22 | 6.13       | 53   | 272  | 0.0891  | 0.0187  | 431   |
| green  | GO:0050817 | coagulation                                 | 1.18E-18 | 1.37E-21 | 6.04       | 53   | 275  | 0.0891  | 0.0189  | 439   |
| green  | GO:0007599 | hemostasis                                  | 1.34E-18 | 1.63E-21 | 6.01       | 53   | 276  | 0.0891  | 0.019   | 438   |
| green  | GO:0030168 | platelet activation                         | 6.62E-17 | 8.76E-20 | 8.91       | 36   | 136  | 0.0605  | 0.00936 | 183   |
| green  | GO:0002576 | platelet degranulation                      | 1.11E-13 | 2.31E-16 | 8.99       | 29   | 108  | 0.0487  | 0.00743 | 131   |
| green  | GO:1903034 | regulation of response to wounding          | 7.40E-10 | 3.14E-12 | 6.26       | 27   | 132  | 0.0454  | 0.00908 | 210   |
| green  | GO:0061041 | regulation of wound healing                 | 1.13E-09 | 5.15E-12 | 7.1        | 24   | 106  | 0.0403  | 0.00729 | 177   |
| green  | GO:0070527 | platelet aggregation                        | 1.73E-09 | 8.18E-12 | 12         | 17   | 51   | 0.0286  | 0.00351 | 68    |
| green  | GO:0003018 | vascular process in circulatory system      | 4.09E-08 | 2.50E-10 | 5.99       | 23   | 116  | 0.0387  | 0.00798 | 201   |
| green  | GO:0034109 | homotypic cell-cell adhesion                | 4.15E-08 | 2.56E-10 | 8.33       | 18   | 70   | 0.0303  | 0.00482 | 90    |
| green  | GO:0006937 | regulation of muscle contraction            | 1.09E-07 | 7.42E-10 | 5.91       | 22   | 112  | 0.037   | 0.0077  | 209   |
| green  | GO:0030193 | regulation of blood coagulation             | 2.52E-07 | 1.86E-09 | 8.53       | 16   | 61   | 0.0269  | 0.0042  | 103   |
| green  | GO:1900046 | regulation of hemostasis                    | 2.52E-07 | 1.86E-09 | 8.53       | 16   | 61   | 0.0269  | 0.0042  | 104   |
| green  | GO:0061045 | negative regulation of wound healing        | 4.28E-07 | 3.31E-09 | 8.99       | 15   | 55   | 0.0252  | 0.00378 | 93    |
| green  | GO:0050818 | regulation of coagulation                   | 5.10E-07 | 3.99E-09 | 8          | 16   | 64   | 0.0269  | 0.0044  | 109   |
| green  | GO:0006939 | smooth muscle contraction                   | 6.48E-07 | 5.09E-09 | 7.83       | 16   | 65   | 0.0269  | 0.00447 | 120   |
| green  | GO:1903035 | negative regulation of response to wounding | 1.27E-06 | 1.03E-08 | 7.38       | 16   | 68   | 0.0269  | 0.00468 | 108   |
| green  | GO:0006940 | regulation of smooth muscle contraction     | 2.32E-06 | 2.02E-08 | 11         | 12   | 38   | 0.0202  | 0.00261 | 68    |
| green  | GO:0030195 | negative regulation of blood coagulation    | 2.32E-06 | 2.02E-08 | 11         | 12   | 38   | 0.0202  | 0.00261 | 68    |
| green  | GO:1900047 | negative regulation of hemostasis           | 2.32E-06 | 2.02E-08 | 11         | 12   | 38   | 0.0202  | 0.00261 | 69    |

|       |            |                                                                                        |          |          |      |    |     |        |         |     |
|-------|------------|----------------------------------------------------------------------------------------|----------|----------|------|----|-----|--------|---------|-----|
| green | GO:0090257 | regulation of muscle system process                                                    | 2.65E-06 | 2.38E-08 | 4.2  | 25 | 169 | 0.042  | 0.0116  | 324 |
| green | GO:0050819 | negative regulation of coagulation                                                     | 4.19E-06 | 3.87E-08 | 10.2 | 12 | 40  | 0.0202 | 0.00275 | 73  |
| green | GO:0090287 | regulation of cellular response to growth factor stimulus                              | 6.69E-06 | 6.36E-08 | 3.84 | 26 | 190 | 0.0437 | 0.0131  | 356 |
| green | GO:0035150 | regulation of tube size                                                                | 5.18E-05 | 5.57E-07 | 5.25 | 16 | 89  | 0.0269 | 0.00612 | 166 |
| green | GO:0035296 | regulation of tube diameter                                                            | 5.18E-05 | 5.57E-07 | 5.25 | 16 | 89  | 0.0269 | 0.00612 | 165 |
| green | GO:0097746 | regulation of blood vessel diameter                                                    | 5.18E-05 | 5.57E-07 | 5.25 | 16 | 89  | 0.0269 | 0.00612 | 165 |
| green | GO:0097581 | lamellipodium organization                                                             | 7.86E-05 | 8.86E-07 | 5.87 | 14 | 71  | 0.0235 | 0.00488 | 97  |
| green | GO:0090092 | regulation of transmembrane receptor protein serine/threonine kinase signaling pathway | 9.00E-05 | 1.03E-06 | 3.7  | 22 | 165 | 0.037  | 0.0114  | 330 |
| green | GO:0007179 | transforming growth factor beta receptor signaling pathway                             | 0.000132 | 1.54E-06 | 3.74 | 21 | 156 | 0.0353 | 0.0107  | 270 |
| green | GO:0030100 | regulation of endocytosis                                                              | 0.000272 | 3.49E-06 | 3.53 | 21 | 164 | 0.0353 | 0.0113  | 233 |
| green | GO:0071560 | cellular response to transforming growth factor beta stimulus                          | 0.000321 | 4.18E-06 | 3.26 | 23 | 193 | 0.0387 | 0.0133  | 327 |
| green | GO:0071559 | response to transforming growth factor beta                                            | 0.000435 | 5.92E-06 | 3.18 | 23 | 197 | 0.0387 | 0.0136  | 336 |
| green | GO:0019935 | cyclic-nucleotide-mediated signaling                                                   | 0.00044  | 6.02E-06 | 4.03 | 17 | 118 | 0.0286 | 0.00812 | 283 |
| green | GO:0030198 | extracellular matrix organization                                                      | 0.000443 | 6.08E-06 | 2.86 | 27 | 255 | 0.0454 | 0.0175  | 473 |
| green | GO:0045987 | positive regulation of smooth muscle contraction                                       | 0.000443 | 6.09E-06 | 13.8 | 7  | 19  | 0.0118 | 0.00131 | 34  |
| green | GO:0043062 | extracellular structure organization                                                   | 0.000472 | 6.54E-06 | 2.85 | 27 | 256 | 0.0454 | 0.0176  | 476 |
| green | GO:0031589 | cell-substrate adhesion                                                                | 0.000598 | 8.67E-06 | 2.74 | 28 | 275 | 0.0471 | 0.0189  | 430 |
| green | GO:0007160 | cell-matrix adhesion                                                                   | 0.00066  | 9.77E-06 | 3.28 | 21 | 175 | 0.0353 | 0.012   | 267 |
| green | GO:0007188 | adenylate cyclase-modulating G protein-coupled receptor signaling pathway              | 0.000706 | 1.06E-05 | 3.84 | 17 | 123 | 0.0286 | 0.00846 | 304 |

|       |            |                                                                                             |          |          |      |    |     |        |         |     |
|-------|------------|---------------------------------------------------------------------------------------------|----------|----------|------|----|-----|--------|---------|-----|
| green | GO:0007187 | G protein-coupled receptor signaling pathway, coupled to cyclic nucleotide second messenger | 0.00072  | 1.09E-05 | 3.65 | 18 | 136 | 0.0303 | 0.00936 | 361 |
| green | GO:0043552 | positive regulation of phosphatidylinositol 3-kinase activity                               | 0.000743 | 1.13E-05 | 9.48 | 8  | 28  | 0.0134 | 0.00193 | 34  |
| green | GO:0038084 | vascular endothelial growth factor signaling pathway                                        | 0.000946 | 1.50E-05 | 9.03 | 8  | 29  | 0.0134 | 0.00199 | 52  |

## **COMBAT Consortium members and affiliations**

David J Ahern (2), Zhichao Ai (2), Mark Ainsworth (19), Chris Allan (1), Alice Allcock (1), Brian Angus (19), M Azim Ansari (1,6), Carolina V Arancibia-Cárcamo (16, 18), Dominik Aschenbrenner (16), Moustafa Attar (1,2), J Kenneth Baillie (28), Eleanor Barnes (6,16,18,19), Rachael Bashford-Rogers (1), Archana Bashyal (19), Sally Beer (39), Georgina Berridge (5), Amy Beveridge (8), Sagida Bibi (8), Tihana Bicanic (33), Luke Blackwell (8), Paul Bowness (13,18), Andrew Brent (19,38), Andrew Brown (1), John Broxholme (1), David Buck (1), Katie L Burnham (27), Helen Byrne (7), Susana Camara (8), Ivan Candido Ferreira (3), Philip Charles (4,5), Wentao Chen (20), Yi-Ling Chen (3), Amanda Chong (1), Elizabeth A Clutterbuck (8), Mark Coles (2), Christopher P Conlon (17,19,31), Richard Cornall (25), Adam P Cribbs (13), Fabiola Curion (1), Emma E Davenport (27), Neil Davidson (19), Simon Davis (5), Calliope A Dendrou (1), Julie Dequaire (19), Lea Dib (2), James Docker (1), Christina Dold (8), Tao Dong (17,25), Damien Downes (3), Hal Drakesmith (3), Susanna J Dunachie (6,19,25,31), David A Duncan (3,21), Chris Eijsbouts (1,4), Robert Esnouf (1,4), Alexis Espinosa (39), Rachel Etherington (3,25), Benjamin Fairfax (3,10,18,19), Rory Fairhead (19), Hai Fang (1), Shayan Fassih (19), Sally Felle (8), Maria Fernandez Mendoza (39), Ricardo Ferreira (1), Roman Fischer (5,17), Thomas Foord (19), Aden Forrow (7), John Frater (6,19), Anastasia Fries (19,20), Veronica Gallardo Sanchez (19), Lucy C Garner (3,16), Clementine Geeves (1), Dominique Georgiou (39), Leila Godfrey (1), Tanya Golubchik (1,4), Maria Gomez Vazquez (2), Angie Green (1), Hong Harper (1), Heather A Harrington (1,7), Raphael Heilig (5), Svenja Hester (5), Jennifer Hill (8), Charles Hinds (34), Clare Hird (19), Ling-Pei Ho (20,25), Renee Hoekzema (7), Benjamin Hollis (12), Jim Hughes (3,26), Paula Hutton (19), Matthew A Jackson-Wood (2), Ashwin Jainarayanan (2), Anna James-Bott (13), Kathrin Jansen (2), Katie Jeffery (19), Elizabeth Jones (8), Luke Jostins (2,4), Georgina Kerr

(36), David Kim (19), Paul Klenerman (6,16), Julian C Knight (1,17,18,19), Vinod Kumar (2), Piyush Kumar Sharma (3,10), Prathiba Kurupati (3,25), Andrew Kwok (1), Angela Lee (1), Aline Linder (8), Teresa Lockett (19), Lorne Lonie (1), Maria Lopopolo (1), Martyna Lukoseviciute (3), Jian Luo (20), Spyridoula Marinou (8), Brian Marsden (2,22), Jose Martinez (39), Philippa C Matthews (6), Michalina Mazurczyk (3,25), Simon McGowan (3), Stuart McKechnie (19), Adam Mead (3,18,19), Alexander J Mentzer (1,19), Yuxin Mi (1), Claudia Monaco (2), Ruddy Montadon (1), Giorgio Napolitani (3,25), Isar Nassiri (3,10), Alex Novak (39), Darragh P O'Brien (5), Daniel O'Connor (8,18), Denise O'Donnell (19), Graham Ogg (3,18,25), Lauren Overend (1), Inhye Park (2), Ian Pavord (20), Yanchun Peng (3,17,25), Frank Penkava (13), Mariana Pereira Pinho (3,25), Elena Perez (39), Andrew J Pollard (8,18), Fiona Powrie (2), Bethan Psaila (3,18), T Phuong Quan (32), Emmanouela Repapi (3,26), Santiago Revale (1), Laura Silva-Reyes (8), Jean-Baptiste Richard (2,3), Charlotte Rich-Griffin (1), Thomas Ritter (19), Christine S Rollier (8), Matthew Rowland (19), Fabian Ruehle (11), Mariolina Salio (3,25), Stephen Nicholas Sansom (2), Raphael Sanches Peres (2), Alberto Santos Delgado (4,23,24), Tatjana Sauka-Spengler (3), Ron Schwessinger (3), Giuseppe Scozzafava (1), Gavin Screatton (1,36), Anna Seigal (7), Malcolm G Semple (29), Martin Sergeant (3), Christina Simoglou Karali (3), David Sims (3), Donal Skelly (6,14,19), Hubert Slawinski (1), Alberto Sobrinodiaz (39), Nikolaos Sousos (3,18,19), Lizzie Stafford (19), Lisa Stockdale (8), Marie Strickland (3), Otto Sumray (7,37), Bo Sun (1), Chelsea Taylor (3,10), Stephen Taylor (3), Adan Taylor (19), Supat Thongjuea (3), Hannah Thraves (39), John A Todd (1), Adriana Tomic (8), Orion Tong (3,10), Amy Trebes (1), Dominik Trzuppek (1), Felicia Anna Tucci (1), Lance Turtle (29,30), Irina Udalova (2), Holm Uhlig (16,19), Erinke van Grinsven (2), Iolanda Vendrell (5), Marije Verheul (8), Alexandru Voda (2), Guanlin Wang (3), Lihui Wang (2), Dapeng Wang (1), Peter Watkinson (14,19), Robert Watson (3,10,19), Michael

Weinberger (3,35), Justin Whalley (1), Lorna Witty (1), Katherine Wray (3,19), Luzheng Xue (20), Hing Yuen Yeung (1), Zixi Yin (17,25), Rebecca K Young (19), Jonathan Youngs (33), Ping Zhang (1), Yasemin-Xiomara Zurke (2).

1: Wellcome Centre for Human Genetics, Nuffield Department of Medicine, University of Oxford, UK

2: Kennedy Institute for Rheumatology, Nuffield Department of Orthopaedics, Rheumatology and Musculoskeletal Diseases, University of Oxford, UK

3: MRC Weatherall Institute of Molecular Medicine (WIMM), University of Oxford, UK

4: Big Data Institute, Nuffield Department of Medicine, University of Oxford, UK

5: Target Discovery Institute, Nuffield Department of Medicine, University of Oxford, UK

6: Peter Medawar Building for Pathogen Research, Nuffield Department of Medicine, University of Oxford, UK

7: Mathematical Institute, University of Oxford, UK

8: Oxford Vaccine Group, Department of Paediatrics, University of Oxford, UK

9: Department of Paediatrics, University of Oxford, UK

10: Department of Oncology, University of Oxford, UK

11: Department of Physics, University of Oxford, UK

12: Jenner Institute, Nuffield Department of Medicine, University of Oxford, UK

13: Botnar Research Centre, Nuffield Department of Orthopaedics, Rheumatology and Musculoskeletal Diseases, University of Oxford, UK

14: Nuffield Department of Clinical Neuroscience, University of Oxford, UK

15: Department of Statistics, University of Oxford, UK

- 16: Translational Gastroenterology Unit, University of Oxford, UK
- 17: Chinese Academy of Medical Science Oxford Institute (COI), University of Oxford, UK
- 18: NIHR Oxford Biomedical Research Centre, Oxford, UK
- 19: Oxford University Hospitals NHS Foundation Trust, Oxford, UK
- 20: Respiratory Medicine Unit, Nuffield Department of Medicine, University of Oxford, UK
- 21: Diamond Light Source, Didcot, UK
- 22: Centre for Medicines Discovery, Nuffield Department of Medicine, University of Oxford, UK
- 23: Center for Health Data Science, University of Copenhagen, DK
- 24: Novo Nordisk Foundation Center for Protein Research, University of Copenhagen, DK
- 25: MRC Human Immunology Unit, Radcliffe Department of Medicine, University of Oxford, UK
- 26: MRC WIMM Centre for Computational Biology, Radcliffe Department of Medicine, University of Oxford, UK
- 27: Wellcome Sanger Institute, Cambridge, UK
- 28: Genetics and Genomics, Roslin Institute, University of Edinburgh, Easter Bush, Midlothian, UK
- 29: NIHR Health Protection Research Unit in Emerging and Zoonotic Infections, Institute of Infection, Veterinary and Ecological Sciences, University of Liverpool, Liverpool
- 30: Tropical and Infectious Diseases Unit, Liverpool University Hospitals NHS Foundation Trust, Liverpool, UK
- 31: Centre for Tropical Medicine and Global Health, Nuffield Department of Medicine, University of Oxford, UK



32: Experimental Medicine Division, Nuffield Department of Medicine, University of Oxford, UK

33: Institute for Infection and Immunity, St George's University of London, UK

34: The William Harvey Research Institute, Bart's and The London, Queen Mary University of London, UK

35: Department of Physiology, Anatomy and Genetics, University of Oxford, UK

36: Medical Sciences Division, University of Oxford, UK

37: Ludwig Institute for Cancer Research, Nuffield Department of Medicine, University of Oxford, UK

38: Nuffield Department of Medicine, University of Oxford, UK

39: Emergency Medicine Research Oxford, Oxford University Hospitals NHS Foundation Trust, Oxford, UK

## **ORFAN Investigators and Affiliations**

Adrian P Banning (1), Alexios S Antonopoulos (1,2), Amrita Bajaj (3), Andrew David Kelion (1), Aparna Deshpande (3), Attila Kardos (4), Benjamin Hudson (5), Bon-Kwon Koo (6), Cheerag Shirodaria (7), Cheng Xie (1), Christos Kotanidis (1), Ciara Mahon (8), Colin Berry (9), David Adlam (3), David Ernest Newby (10), Derek Leslie Connolly (11), Diane Elizabeth Scaletta (4), Donna Alexander (3), Ed Nicol (8), Elisa McAlindon (12), Evangelos Oikonomou (13), Francesca Pugliese (14), Gianluca Pontone (15), Giulia Benedetti (16), Guo-Wei He (17), Henry West (1), Hidekazu Kondo (1), Imre S Benedek (18), Intrajeet Das (3), John Deanfield (19), John Graby (5), John Greenwood (20), Jonathan Carl Luis Rodrigues (5), Junbo Ge (21), Keith M Channon (1), Larissa Fabritz (22), Li-Juan Fan (17), Lucy Kingham (1), Marco Guglielmo (15), Maria Lyasheva (1), Matthias Schmitt (23), Meinrad Beer (24), Michelle Louise Anderson (20), Milind Y Desai (25), Mohamed Marwan (26), Naohiko Takahashi (27), Nehal N Mehta (28), Neng Dai (21), Nicholas Screatton (29), Nikant Kumar Sabharwal (7), Pál Maurovich-Horvat (30), Praveen PG Rao (3), Rafail Angelos Kotronias (1), Rajesh Kumar Kharbanda (7), Rebecca Louise Preston (16), Richard James Wood (5), Ron Blankstein (31), Ronak Rajani (16), Saeed Mirsadraee (8), Shahzad Mahmood Munir (12), Sheena Thomas (1), Stefan Neubauer (1), Steffen Christoph Klömpken (24), Steffen E Petersen (14), Stephan Achenbach (26), Susan Anthony (7), Sze Mun Mak (16), Tarun Mittal (8), Theodora M Benedek (18), Vinoda Sharma (11), Wen-Hua Lin (17).

1: Division of Cardiovascular Medicine, Radcliffe Department of Medicine, University of Oxford

2: Hippokration General Hospital, Athens, Greece

3: University Hospitals of Leicester NHS Trust

4: Milton Keynes University Hospital NHS Foundation Trust

- 5: Royal United Hospitals Bath NHS Foundation Trust
- 6: Seoul National University, Seoul, South Korea
- 7: Oxford University Hospitals NHS Foundation Trust
- 8: Royal Brompton and Harefield Hospitals
- 9: BHF Glasgow Cardiovascular Research Centre, University of Glasgow
- 10: BHF Edinburgh Clinical Research Facility
- 11: Sandwell & West Birmingham Hospitals NHS Trust
- 12: Heart and Lung Centre, New Cross Hospital, Wolverhampton
- 13: Section of Cardiovascular Medicine. Yale-New Haven Hospital, Yale School of Medicine
- 14: NIHR Barts Cardiovascular Biomedical Research Centre
- 15: Centro Cardiologico Monzino IRCCS, University of Milan, Italy
- 16: Guy's and St Thomas' NHS Foundation Trust
- 17: TEDA International Cardiovascular Hospital, Tianjin, China
- 18: University of Medicine and Pharmacy of Tirgu Mures, Romania
- 19: University College London
- 20: Leeds Teaching Hospitals NHS Foundation Trust
- 21: Fudan University, China
- 22: University Hospitals Birmingham NHS Trust
- 23: University Hospital of Manchester Foundation Trust
- 24: University Hospital Ulm, Germany
- 25: Heart and Vascular Institute, Cleveland Clinic
- 26: Department of Cardiology, Friedrich-Alexander-Universität Erlangen-Nürnberg, Erlangen, Germany

27: Oita University, Japan

28: National Institutes of Health, National Heart, Lung, and Blood Institute

29: Royal Papworth Hospital NHS Trust, Cambridge

30: Department of Radiology, MTA-SE Cardiovascular Imaging Research Group, Budapest,  
Hungary

31: Harvard Medical School, Boston, USA

TRIPOD Checklist: Prediction Model Development

| Section/Topic                | Item | Checklist Item                                                                                                                                                                                        | Page          |
|------------------------------|------|-------------------------------------------------------------------------------------------------------------------------------------------------------------------------------------------------------|---------------|
| <b>Title and abstract</b>    |      |                                                                                                                                                                                                       |               |
| Title                        | 1    | Identify the study as developing and/or validating a multivariable prediction model, the target population, and the outcome to be predicted.                                                          | 1             |
| Abstract                     | 2    | Provide a summary of objectives, study design, setting, participants, sample size, predictors, outcome, statistical analysis, results, and conclusions.                                               | 2-3           |
| <b>Introduction</b>          |      |                                                                                                                                                                                                       |               |
| Background and objectives    | 3a   | Explain the medical context (including whether diagnostic or prognostic) and rationale for developing or validating the multivariable prediction model, including references to existing models.      | 6             |
|                              | 3b   | Specify the objectives, including whether the study describes the development or validation of the model or both.                                                                                     | 6-7           |
| <b>Methods</b>               |      |                                                                                                                                                                                                       |               |
| Source of data               | 4a   | Describe the study design or source of data (e.g., randomized trial, cohort, or registry data), separately for the development and validation data sets, if applicable.                               | 7-9           |
|                              | 4b   | Specify the key study dates, including start of accrual; end of accrual; and, if applicable, end of follow-up.                                                                                        | 7-9           |
| Participants                 | 5a   | Specify key elements of the study setting (e.g., primary care, secondary care, general population) including number and location of centres.                                                          | 7-9           |
|                              | 5b   | Describe eligibility criteria for participants.                                                                                                                                                       | App 1         |
|                              | 5c   | Give details of treatments received, if relevant.                                                                                                                                                     | N/A           |
| Outcome                      | 6a   | Clearly define the outcome that is predicted by the prediction model, including how and when assessed.                                                                                                | 7             |
|                              | 6b   | Report any actions to blind assessment of the outcome to be predicted.                                                                                                                                | App 6         |
| Predictors                   | 7a   | Clearly define all predictors used in developing or validating the multivariable prediction model, including how and when they were measured.                                                         | App 13        |
|                              | 7b   | Report any actions to blind assessment of predictors for the outcome and other predictors.                                                                                                            | App 6         |
| Sample size                  | 8    | Explain how the study size was arrived at.                                                                                                                                                            | App 12        |
| Missing data                 | 9    | Describe how missing data were handled (e.g., complete-case analysis, single imputation, multiple imputation) with details of any imputation method.                                                  | App 12        |
| Statistical analysis methods | 10a  | Describe how predictors were handled in the analyses.                                                                                                                                                 | App 13        |
|                              | 10b  | Specify type of model, all model-building procedures (including any predictor selection), and method for internal validation.                                                                         | App 10-11     |
|                              | 10d  | Specify all measures used to assess model performance and, if relevant, to compare multiple models.                                                                                                   | App 10-11     |
| Risk groups                  | 11   | Provide details on how risk groups were created, if done.                                                                                                                                             | App 13        |
| <b>Results</b>               |      |                                                                                                                                                                                                       |               |
| Participants                 | 13a  | Describe the flow of participants through the study, including the number of participants with and without the outcome and, if applicable, a summary of the follow-up time. A diagram may be helpful. | App 17        |
|                              | 13b  | Describe the characteristics of the participants (basic demographics, clinical features, available predictors), including the number of participants with missing data for predictors and outcome.    | App 31, 34-36 |
| Model development            | 14a  | Specify the number of participants and outcome events in each analysis.                                                                                                                               | App 18        |
|                              | 14b  | If done, report the unadjusted association between each candidate predictor and outcome.                                                                                                              | N/A           |
| Model specification          | 15a  | Present the full prediction model to allow predictions for individuals (i.e., all regression coefficients, and model intercept or baseline survival at a given time point).                           | App 39        |
|                              | 15b  | Explain how to use the prediction model.                                                                                                                                                              | 12-14         |
| Model performance            | 16   | Report performance measures (with CIs) for the prediction model.                                                                                                                                      | Figure 4      |
| <b>Discussion</b>            |      |                                                                                                                                                                                                       |               |
| Limitations                  | 18   | Discuss any limitations of the study (such as nonrepresentative sample, few events per predictor, missing data).                                                                                      | 20-21         |
| Interpretation               | 19b  | Give an overall interpretation of the results, considering objectives, limitations, and results from similar studies, and other relevant evidence.                                                    | 18            |
| Implications                 | 20   | Discuss the potential clinical use of the model and implications for future research.                                                                                                                 | 21            |
| <b>Other information</b>     |      |                                                                                                                                                                                                       |               |
| Supplementary information    | 21   | Provide information about the availability of supplementary resources, such as study protocol, Web calculator, and data sets.                                                                         | 22            |
| Funding                      | 22   | Give the source of funding and the role of the funders for the present study.                                                                                                                         | 11            |

We recommend using the TRIPOD Checklist in conjunction with the TRIPOD Explanation and Elaboration document.
